1 **A primer genetic toolkit for exploring mitochondrial biology and disease using**  
2 **zebrafish**

3 Ankit Sabharwal<sup>1</sup>, Jarryd M. Campbell<sup>1,2</sup>, Zachary WareJoncas<sup>1</sup>, Mark Wishman<sup>1</sup>, Hirotaka  
4 Ata<sup>1,2</sup>, Wiebin Liu<sup>1,3</sup>, Noriko Ichino<sup>1</sup>, Jake D. Bergren<sup>1</sup>, Mark D. Urban<sup>1</sup>, Rhianna Urban<sup>1</sup>, Tanya  
5 L. Poshusta<sup>1</sup>, Yonghe Ding<sup>1,3</sup>, Xiaolei Xu<sup>1,3</sup>, Karl J. Clark<sup>1,2</sup>, Stephen C. Ekker<sup>1,2\*</sup>

6 1. Department of Biochemistry and Molecular Biology, Mayo Clinic, Rochester, MN 55905,  
7 USA

8 2. Center for Clinical and Translational Sciences, Mayo Clinic, Rochester, MN 55905, USA

9 3. Division of Cardiovascular Diseases, Mayo Clinic, Rochester, MN 55905, USA

10 \*Corresponding author: [Ekker.Stephen@mayo.edu](mailto:Ekker.Stephen@mayo.edu)

11 **Keywords:**

12 Mitochondria, Mitochondrial disorders, Zebrafish, gene editing,

13 TALEN, Gene Breaking Transposon

## 14 **Abstract**

15 Mitochondria are a dynamic eukaryotic innovation that play diverse roles in biology and disease.  
16 The mitochondrial genome is remarkably conserved in all vertebrates, encoding the same 37  
17 gene set and overall genomic structure ranging from 16,596 base pairs (bp) in the teleost  
18 zebrafish (*Danio rerio*) to 16,569 bp in humans. Mitochondrial disorders are amongst the most  
19 prevalent inherited diseases affecting roughly 1 in every 5000 individuals. Currently, few  
20 effective treatments exist for those with mitochondrial ailments, representing a major unmet  
21 patient need. Mitochondrial dysfunction is also implicated to be a common component of a wide  
22 variety of other human illnesses ranging from neurodegenerative disorders like Huntington's  
23 disease and Parkinson's disease to autoimmune illnesses such as multiple sclerosis and  
24 rheumatoid arthritis. The electron transport chain (ETC) component of mitochondria is critical  
25 for mitochondrial biology and defects can lead to many mitochondrial disease symptoms. Here  
26 we present a publicly available collection of genetic mutants created in highly conserved,  
27 nuclear-encoded mitochondrial genes in *Danio rerio*. The zebrafish system represents a  
28 potentially powerful new opportunity for the study of mitochondrial biology and disease due to  
29 the large number of orthologous genes shared with humans and the many advanced features of  
30 this model system from genetics to imaging. This collection includes 24 mutant lines in 18  
31 different genes created by locus-specific gene editing to induce frameshift or splice acceptor  
32 mutations leading to predicted protein truncation during translation. Also included are 7 lines  
33 created by the random insertion of the gene-breaking transposon (GBT) protein trap cassette. All  
34 of these targeted mutant alleles truncate conserved domains of genes critical to the proper  
35 function of the ETC or genes that have been implicated in human mitochondrial disease. This  
36 collection is designed to accelerate the use of zebrafish to study of many different aspects of

- 37 mitochondrial function with the goal of widening our understanding of their role in biology and
- 38 human disease.

## 39 **Introduction**

40 Mitochondria are semi-autonomous organelles critical for eukaryotic cell function. The  
41 mitochondrial endosymbiotic genesis origin hypothesis proposes its evolution from an alpha  
42 proteobacterial ancestor, *Rickettsia prowazekii* [1,2] that were harnessed by a eukaryotic cell as  
43 the host billions of years ago [3]. The proteobacterium became a symbiote of the host cell,  
44 bringing with it a system for more efficient generation of cellular energy in the form of ATP.

45 During the course of evolution, the genetic material of the mitochondria underwent reductive  
46 expansion and was transferred in a retrograde fashion to the nuclear genome. The retrograde  
47 movement of genes from the mitochondria to its eukaryotic host paved the way for the  
48 mitochondria to specialize as energy production organelles rather than consuming energy  
49 repetitively replicating its own multi-copy genome. The mitochondrial-encoded genetic material  
50 at present is a vestige of the original proteobacterial genome [4–6] meaning despite having DNA  
51 of their own, mitochondria rely heavily on the nuclear genes for most of their functions.

52 Mitochondria have critical functions in metabolism, organ homeostasis, apoptosis and aging.  
53 They also play important but still largely mysterious roles in human pathology, as demonstrated  
54 by the enormous biological variation and diverse disorders in patients with mitochondrial disease  
55 [7–10]. Nearly every organ system can be compromised, but with highly variable and complex  
56 physiological and biochemical outcomes. Imaging and basic science of mitochondria showcase  
57 how this highly dynamic organelle responds differentially to extrinsic and intrinsic biological  
58 signals. However, understanding how mitochondria function in normal biology, and how human  
59 mitochondrial DNA variations contribute to health and disease, has been hampered by a lack of  
60 effective approaches to manipulate the powerhouse of the cell.

61 The vertebrate mitochondrial chromosome is circular and includes 37 genes, 13 encoding for  
62 protein subunits of the electron transport chain, 22 coding for transfer RNAs, and 2 encoding  
63 ribosomal RNAs (**Figure 1**) [11,12]. The mitochondrial gene order, strand specific nucleotide  
64 bias and codon usage is highly conserved [13]. However, mtDNA encoded genes lack introns  
65 and utilize a divergent genetic code than their nuclear counterparts [14,15]. For instance, AUA  
66 codon codes for methionine as per mitochondrial genetic code, whereas the same sequence codes  
67 for isoleucine in the nuclear genetic code. Similarly, nuclear stop codon UGA is read as the  
68 tryptophan amino acid by the mitochondrial codon cypher.

69 Mitochondria are unique cellular compartments with different DNA and RNA repair and editing  
70 rules, hampering attempts at directly manipulating these nucleic acid components. For example,  
71 DNA nucleases that introduce double stranded breaks and subsequent repair in nuclear DNA  
72 induce the degradation of mtDNA [16–18]. Indeed, none of the canonical DNA repair pathways  
73 found in the nucleus have been shown to be active in mitochondria [18–20]. Finally, no system  
74 has demonstrated the ability to deliver exogenous DNA or RNA to mitochondria, restricting the  
75 tools available for mtDNA editing [21,22]. All of these factors are distinct from the nuclear  
76 genome, making mtDNA a far less accessible genome for traditional gene editing methods and  
77 reagents.

78 The diverse functions that mitochondria are capable of, including oxidative phosphorylation,  
79 would not be possible with the small subset of 13 proteins encoded in mtDNA. Discoveries led  
80 by high throughput proteomic approaches have enhanced our knowledge of the mitochondrial  
81 proteome [23–27]. There are approximately 1158 nuclear-encoded proteins that localize to the  
82 mammalian mitochondria, exerting a dual genetic control via its nuclear counterpart. Nuclear-  
83 encoded mitochondrial proteins on the basis of their mitochondrial function can be broadly

84 classified into different categories including oxidative phosphorylation, energy production,  
85 membrane dynamics, genome maintenance, and ion/metabolite homeostasis.

86 Unlike the nuclear genome, where most cells have only two copies, each cell can harbor  
87 thousands of copies of mtDNA, depending on environmental needs, making mitochondrial  
88 genome engineering a population genetics challenge. When every mtDNA molecule is identical  
89 with non-mutagenic variants, the cell is in a genetic state, called homoplasmy, and the  
90 mitochondria functions normally. In people with mtDNA-based mitochondrial disease, mtDNA  
91 genomes harboring pathogenic mutations typically co-exist with the healthy genomes in a state  
92 called heteroplasmy. Homoplasmy may also arise when the cell harbors only mutant mtDNA  
93 molecules, resulting in severe clinical manifestations. [28]. The ratio of pathogenic-harboring to  
94 nonpathogenic-harboring mtDNA is critical to mitochondrial disease onset. A threshold exists  
95 for most mitochondrial disease, at which, the healthy mtDNA genomes can no longer  
96 compensate for the pathogenic genomes, resulting in disease onset leading to breakdown of  
97 oxidative phosphorylation and other mitochondrial function(s) [29].

98 Mitochondrial disorders are a heterogeneous group of clinical manifestations resulting from  
99 either inherited or spontaneous mutations in mtDNA or nDNA leading to altered structure or  
100 function of the proteins or RNA that reside in mitochondria [6,10,30,31]. The pathophysiology  
101 of mitochondrial disorders involves functions of both the nuclear and mitochondrial genomes,  
102 conferring additional complexity to the manifestation of the syndromes. The prevalence of  
103 mitochondrial disorders is about 1 in 5000 live births; however, the prevalence is often  
104 influenced by the presence of founder mutations and consanguinity in populations [31–33].  
105 These conditions range in severity dependent on the specific mutation and its prevalence and

106 localization within the patient. In addition to diseases specifically progenerated by mitochondrial  
107 defects, mitochondrial dysfunction has also been implicated as a cofactor or by-product of many  
108 other conditions; including cancer, immune diseases, developmental delays and  
109 neurodegenerative condition such as Alzheimer's [34–38].

110 Mitochondrial dysfunction tends to affect primarily high energy systems and can therefore have  
111 devastating effects on a wide range of body systems including brain function, liver function,  
112 vision, hearing, immune function, and all muscle types [31,39]. The identification and  
113 characterization of novel mitochondrial genes in human genetic disorders have also enhanced our  
114 knowledge of mitochondrial function [40–44]. However, despite their known prevalence and  
115 severity, mitochondrial diseases remain understudied as compared to other genetic conditions,  
116 and the options for treatment are limited.

117 The conserved roles of mitochondria have been traditionally uncovered using accessible model  
118 systems such as the yeast *S.cerevisiae* [45–48] and invertebrates including *C.elegans* [49–52]  
119 and *D. melanogaster* [53–56]. Vertebrate mitochondria, however, are known to have additional  
120 innovations and encode unique subunits not present in invertebrate models [5,45,57–67]. Most  
121 exploration to date of vertebrate mitochondrial biology has been conducted either in cell culture  
122 or in mouse models. However, cells in a dish are missing important environmental cellular and  
123 organismal context, whereas mouse mitochondrial experimental work can be hindered by limited  
124 population size and invasive imaging techniques.

125 We provide here an initial genetic toolkit for modeling mitochondrial biology and disease in  
126 *Danio rerio* (zebrafish) in an effort to help catalyze the use of this invaluable model organism in  
127 mitochondrial research. The zebrafish is a tropical freshwater teleost that has proven to be an  
128 invaluable resource for the study of human disease and genetics [68–70]. Principal among the

129 many research amenable characteristics of zebrafish are their high genetic orthology to humans,  
130 high fecundity, their optical transparency (in the embryonic stage) that lends itself to facile  
131 imaging, and the ease of reagent delivery through microinjection into the single celled embryo,  
132 which is a full millimeter across before the first mitotic division. Zebrafish also serve as a  
133 potentially powerful vertebrate model organism to study human mitochondrial disorders because  
134 of conserved mitochondrial genome and mitochondrial genetic machinery. Zebrafish and human  
135 mitochondrial chromosomes display ~65% sequence identity at the nucleotide level, and share  
136 the same codon usage, strand specific nucleotide bias and gene order [12] (**Figure 1**).

137 Over the recent years, zebrafish research has helped shed light on mitochondrial biology and  
138 further developed our understanding of the mechanisms of mitochondrial-associated pathology  
139 [71–76]. Zebrafish have also been successfully used as a model system to study mitochondrial  
140 targeting drugs with implications in development and cardiovascular function [71,77,78]. These  
141 drugs can simply be dissolved in the water housing the larvae and offer an advantage of large  
142 sample size with minimal volumes of drug administered. Drug-screening studies have aided in  
143 understanding the pathogenesis of various diseases and helped to identify targets for treatment  
144 [77].

145 To help engender an expansion of zebrafish deployment in mitochondrial research, we present a  
146 panel or “starter-pack” toolkit of genetic mutants made in nuclear-encoded mitochondrial genes  
147 in zebrafish. This mutant panel, which we have named the Marriot Mitochondrial Collection  
148 (MMC), consists of 30 zebrafish lines with mutations in 24 different mitochondrial genes. The  
149 mutant collection focusses primarily on genes that encode for components of the energy  
150 generating electron transport chain with at least one mutant in each complex of the ETC. Other  
151 mutants consist of assembly factors, protein chaperones that manage mitochondrial membrane



152 traffic, and genes related to mitochondrial replication. These mutants were made either by the  
153 use of targeted endonuclease [79], or curated from our research group's library of randomly  
154 generated insertional mutants [80]. We hope that this collection, in addition to being intrinsically  
155 useful, will also help serve as a primer to the modeling of mitochondrial biology and disease in  
156 zebrafish.

## 157 **Methods**

### 158 **Zebrafish Handling**

159 All animal work was conducted under Mayo Clinic's institutional animal welfare approvals  
160 (IACUC number: A34513-13-R16).

### 161 **Identification of zebrafish orthologs having putative mitochondrial function**

162 A previous study combining discovery and subtractive proteomics with computational,  
163 microscopy identified 1098 mouse genes that could encode for proteins residing in mitochondria  
164 [24]. They further identified 1013 human orthologs for these genes, providing an initial  
165 inventory of the genes coding for proteins resident in mitochondria. Using literature assessment  
166 and HUGO database curation approaches, we identified 97 proteins that are involved in the  
167 biogenesis and assembly of electron transport chain in mitochondria. Using zebrafish orthologs  
168 of human genes from ZFIN (Zebrafish Information Network), 93 zebrafish mitochondrial  
169 orthologs were identified. These orthologs were systemically annotated with respect to clinical  
170 phenotype by extensive mining from PubMed based published case reports and OMIM database  
171 **(Supplementary Table 1).**

172

## 173 **Mutant Generation**

174 Mutant lines were created by one of two methods, either through the targeted use of  
175 Transcription Activator Like Effector Nucleases (TALENs) [79] or by screening Gene Breaking  
176 Transposon (GBT) lines for integrations into mitochondrial genes [80]. Reagents were delivered  
177 in both methods by the microinjection of either TALEN pairs or GBT transposon and Tol2  
178 transposase into single cell zebrafish embryos.

## 179 **TALEN Design/Assembly/Delivery**

180 The TALEN mutants in this collection were originally generated as part of a previously  
181 published study [79]. In brief, TALEN pairs were designed using the Mojohand software  
182 platform [81] ([www.talendesign.org](http://www.talendesign.org)) to target highly conserved, and therefore likely functionally  
183 important, areas of nuclear-encoded mitochondrial genes. TALEN RVDs were then cloned into  
184 pT3Ts-GoldyTALEN (TALEN vector with a T3 transcriptional promoter for in vitro  
185 transcription) using the FusX rapid TALEN assembly system [79], which uses the RVD  
186 definitions: HD=C, NN=G, NI=A, NG=T. Following assembly, mRNA was synthesized in vitro  
187 using the mMessage Machine T3 kit (Ambion) and extracted by a phenol-chloroform extraction  
188 as prescribed in the mMessage Machine manual. The extracted mRNA was then delivered into  
189 single cell zebrafish embryos at 100pg doses (50pg per TALEN arm) by microinjection.

## 190 **TALEN Mutant Screening**

191 Following microinjection, genomic DNA was extracted from F0 larvae three days post  
192 fertilization (dpf) by sodium hydroxide extraction. DNA for eight individual larvae was analyzed  
193 for NHEJ activity at the TALEN target site by Restriction Fragment Length Polymorphism  
194 (RFLP) analysis. Groups with high reported NHEJ activity by RFLP were raised to adulthood

195 and outcrossed to create an F1 generation. Suspected NHEJ mutants were further verified by  
196 Sanger sequencing. F1 larvae demonstrating NHEJ mutations confirmed by both RFLP and  
197 Sanger sequencing were raised to adulthood. Fin biopsies were performed on these adults and  
198 DNA was extracted by sodium hydroxide extraction.

### 199 **Gene Breaking Transposon System**

200 The Gene Breaking Transposon System of protein trap system and a complete repository of  
201 protocols for the creation and screening of GBT mutant lines has been described [80]. In short,  
202 protein trap transposons were delivered in combination with mRNA for Tol2 transposase (25pg  
203 each) into single cell zebrafish embryos by microinjection. Embryos were screened for GFP  
204 fluorescence at 3-4dpf and classified broadly into three classes [80]. Class three embryos, those  
205 with whole body GFP expression, were raised to adulthood and outcrossed to non-transgenic  
206 lines to create an F1 generation. mRFP-expressing F1 embryos were sorted by expression  
207 pattern, assigned a GBT number, and raised to adulthood. These adult fish were then outcrossed  
208 to non-transgenic lines to create an F2 generation upon which all subsequent propagation, testing  
209 and imaging was conducted.

210 To determine genes tagged by the protein trap system, rapid amplification of cDNA ends  
211 (RACE) was performed as described [82] with minor updates to primer sequences. cDNA was  
212 generated using a transposon-specific primer (5R-mRFP-P0) against 250ng of total mRNA in the  
213 reverse transcription reaction. PCR was then performed using the following gene-specific  
214 primers: 5R-mRFP-P1 and 5R-mRFP-P2. The resulting products were TA cloned for further  
215 amplification and then sequence verified for in-frame mRFP fusions by Sanger sequencing.

216 In some cases, inverse PCR was also conducted to RACE PCR as described [80]. Whole  
217 genomic DNA was extracted from individual F2 embryos using a sodium hydroxide extraction  
218 and 800ng was digested in a combination reaction using AvrII, NheI, SpeI, and XbaI restriction  
219 enzymes. Approximately 200ng of the product of this digestion was self-ligated and used as a  
220 template for PCR using the following nested and primary primers. 5' side: 5R-mRFP-P1 and 5R-  
221 mRFP-P2 paired with INV-OPT-P1 and INV-OPT-P2, respectively. 3' side: 5R-GFP-P1 and 5R-  
222 GFP-P2 with Tol2-ITR(L)-O1 and Tol2-ITR(L)-O3, respectively. The products of the final  
223 nested reaction were gel-extracted, cloned, and sequenced. Prospective in frame mRFP fusions  
224 were further verified by comparing suspected protein trap allele to GBT expression pattern and  
225 by PCR against DNA or cDNA from mRFP carrier siblings versus non-carrier siblings.

226 Protein trap lines as verified by these methods were catalogued for specific genomic fusions  
227 using the National Center for Biotechnology Information's (NCBI) Homologene Database.  
228 Human orthologs for tagged genes were further identified using blastX searches against the  
229 human genome. GBT lines with protein trap fusions to nuclear encoded mitochondrial genes  
230 with human orthologues have been included in this collection.

231 ***In silico* analysis to determine protein homology and alteration of DNA sequence by**  
232 **TALENs and GBT in zebrafish mutants**

233 Human amino acid sequences were compared to both the zebrafish wild type sequence and each  
234 specific zebrafish mutant sequence associated with each allele. Amino acid sequence information  
235 for a particular gene was gathered for humans from <https://www.uniprot.org/> along with the wild  
236 type amino acid sequence for the zebrafish. The first/most common isoform for each entry was  
237 used for this analysis. Any added information regarding functional domains or regions was also  
238 gathered. A protein-protein BLAST was conducted using <https://blast.ncbi.nlm.nih.gov/Blast.cgi>

239 to compare the sequences of the human and wild type zebrafish amino acid sequences. BLAST  
240 search settings used included the blastp algorithm. Regions of low and high homology were then  
241 mapped out for the sequences.

242 For zebrafish mutant to human comparisons, the cDNA or DNA sequences were gathered via  
243 sequencing and put through the translate tool at <https://web.expasy.org/translate/>. The standard  
244 genetic code was used for conversion. Stop codons arising from the frameshifted DNA sequence  
245 were found in all mutants. The BLAST analysis conducted on the mutants was taken from the  
246 starting methionine to the first encountered stop codon. Regions of low and high homology were  
247 then mapped for each sequence.

#### 248 **Access to all reported reagents – zebrafish and sequences**

249 All listed tools are immediately available through the Mayo Clinic Zebrafish Facility, and all fish  
250 lines will be available via ZIRC. Sequences needed for genotyping and related metadata are  
251 currently on zfishbook [83].

## 252 **RESULTS**

### 253 **Generation of zebrafish mutant collection**

254 We generated zebrafish mutants for a wide selection of nuclear-encoded mitochondrial genes by  
255 employing two genetic engineering approaches, gene breaking transposons and TALENs. The  
256 collection of zebrafish mutants is referred as the Marriot Mitochondrial Collection (MMC) and  
257 comprises of mutants for 24 nuclear-encoded mitochondrial proteins (**Figure 2**). Out of these, 18  
258 were created by TALEN indel mutagenesis and 6 were created by gene breaking trap  
259 mutagenesis. The mutants include proteins from all known functional pathways involved in  
260 mitochondrial homeostasis and ATP generation (**Figure 2**).

261 Broadly, the pathways can be classified as subunits of oxidative phosphorylation complexes,  
 262 chaperones for assembly of oxidative phosphorylation proteins, maintenance proteins for the  
 263 mitochondrial genome (replication, mtRNA folding and translation), calcium homeostasis and  
 264 mitochondrial protein import. All of these genes have human orthologs, nearly all with known  
 265 mutations in which lead to severe clinical manifestations such as Leigh syndrome,  
 266 cardiomyopathy, progressive external ophthalmoplegia, and oxidative phosphorylation  
 267 deficiency (**Table 1**).

268 **Table 1: List of nuclear-encoded genes for which zebrafish mutants were generated as part**  
 269 **of MMC collection:** The current MMC resource list summarizes information on human gene,  
 270 zebrafish ortholog, mouse ortholog, relevant clinical phenotypes and diseases, protein function,  
 271 and OMIM ID. Green = Created by TALEN Indel Mutagenesis, Orange = Curated from GBT  
 272 protein trap lines (Keywords: Chr- Chromosome; OMIM ID: Online Mendelian Inheritance in  
 273 Man ID; NA-not available).

| Approved symbol | Approved name                                            | Human chr | Zebrafish orthologs                | Zebrafish chr | Allele designator | Mouse orthologs | Mouse chr | Clinical phenotype observed in humans                                                                                                                                           | Disease                                                                            | Biological function                                    | OMIM ID |
|-----------------|----------------------------------------------------------|-----------|------------------------------------|---------------|-------------------|-----------------|-----------|---------------------------------------------------------------------------------------------------------------------------------------------------------------------------------|------------------------------------------------------------------------------------|--------------------------------------------------------|---------|
| <i>NDUFAB1</i>  | NADH:ubiquinone oxidoreductase subunit AB1               | 16        | <i>ndufab1a</i><br><i>ndufab1b</i> | 1<br>3        | mn0135            | Ndufab1b        | 7         | -na-                                                                                                                                                                            | -na-                                                                               | Oxidative phosphorylation enzymes - Complex I          | 603836  |
| <i>NDUFA6</i>   | NADH:ubiquinone oxidoreductase complex assembly factor 6 | 8         | <i>ndufaf6</i>                     | 16            | mn0117            | Ndufaf6         | 4         | Focal right-hand seizures, ataxia, lactic acidosis, exercise intolerance, weakness and muscle tension                                                                           | Leigh syndrome, mitochondrial complex I deficiency                                 | Oxidative phosphorylation complex assembly - Complex I | 612392  |
| <i>NDUFS4</i>   | NADH:ubiquinone oxidoreductase subunit S4                | 5         | <i>ndufs4</i>                      | 5             | mn0118            | Ndufs4          | 13        | Mitochondrial complex I deficiency                                                                                                                                              | Mitochondrial complex-I deficiency                                                 | Oxidative phosphorylation enzymes - Complex I          | 602694  |
| <i>SDHA</i>     | Succinate dehydrogenase complex flavoprotein subunit A   | 5         | <i>sdha</i>                        | 19            | mn0121            | Sdha            | 13        | Dyspnea, cardiomegaly, cardiomyopathy, nystagmus, hypotonia, gastrointestinal stromal tumors, paragangliomas, pheochromocytoma, psychomotor regression, severe hyperandrogenism | Mitochondrial complex-II deficiency; Cardiomyopathy; Leigh syndrome; Paraganglioma | Oxidative phosphorylation enzymes - Complex II         | 600857  |

| Approved symbol | Approved name                                                          | Human chr | Zebrafish orthologs | Zebrafish chr | Allele designator | Mouse orthologs | Mouse chr | Clinical phenotype observed in humans                                                                                                                                                                           | Disease                                                                                                    | Biological function                                                          | OMIM ID |
|-----------------|------------------------------------------------------------------------|-----------|---------------------|---------------|-------------------|-----------------|-----------|-----------------------------------------------------------------------------------------------------------------------------------------------------------------------------------------------------------------|------------------------------------------------------------------------------------------------------------|------------------------------------------------------------------------------|---------|
| <i>BCS1L</i>    | BCS1 homolog, ubiquinol-cytochrome C reductase complex chaperone       | 2         | <i>bcs1l</i>        | 9             | mn0102            | Bcs1l           | 1         | Growth retardation, aminoaciduria, cholestasis, iron overload, lactic acidosis, early death, hypotonia, encephalopathy, microcephaly, psychomotor regression, hypoglycemia and hepatic failure                  | Björnstad syndrome; GRACILE syndrome; Leigh syndrome; Mitochondrial complex III deficiency, nuclear type 1 | Oxidative phosphorylation complex assembly - Complex III                     | 603647  |
| <i>UQCRCQ</i>   | ubiquinol-cytochrome c reductase complex III subunit VII               | 5         | <i>uqcrq</i>        | 14            | mn0128<br>mn0129  | Uqcrq           | 11        | Severe psychomotor retardation and extrapyramidal signs, dystonia, athetosis and ataxia, mild axial hypotonia and marked global dementia                                                                        | Mitochondrial complex III deficiency                                                                       | Mitochondrial complex III: ubiquinol-cytochrome c reductase complex subunits | 612080  |
| <i>COX10</i>    | Cytochrome c oxidase assembly factor heme A: farnesyltransferase COX10 | 17        | <i>cox10</i>        | 12            | mn0107<br>mn0108  | Cox10           | 11        | Muscle weakness, hypotonia, ataxia, ptosis, pyramidal syndrome, status epilepticus, lactic acidosis, hypertrophic cardiomyopathy, hypoglycemia and metabolic acidosis                                           | Leigh syndrome due to mitochondrial COX IV deficiency; Mitochondrial complex IV deficiency                 | Oxidative phosphorylation complex assembly - Complex IV                      | 602125  |
| <i>COX4I2</i>   | Cytochrome C Oxidase Subunit 4I2                                       | 20        | <i>cox4i2b</i>      | 23            | mn0104            | Cox4i2          | 2         | Exocrine pancreatic insufficiency, dyserythropoietic anemia, and calvarial hyperostosis                                                                                                                         | Exocrine pancreatic insufficiency, dyserythropoietic anemia, and calvarial hyperostosis                    | Oxidative phosphorylation complex enzymes - Complex IV                       | 607976  |
| <i>SURF1</i>    | SURF1, Cytochrome C Oxidase Assembly Factor                            | 9         | <i>surf1</i>        | 5             | mn0123            | Surf1           | 2         | Childhood onset neuropathy, lactic acidosis, mild intellectual disability ataxia, facial dysmorphism, encephalopathy, hypotonia, cerebellar ataxia, deafness, ophthalmoplegia, growth retardation and nystagmus | Charcot-Marie-Tooth disease, type 4K; Leigh syndrome, due to COX IV deficiency                             | Involved in biogenesis of cytochrome c oxidase complex                       | 185620  |
| <i>ATP5F1E</i>  | ATP synthase F1 subunit epsilon                                        | 20        | <i>atp5f1e</i>      | 6             | mn0101            | Atp5f1e         | 2         | Neonatal-onset lactic acidosis, 3-methylglutaconic aciduria, mild mental retardation, and peripheral neuropathy                                                                                                 | Mitochondrial complex (ATP synthase) deficiency                                                            | Oxidative phosphorylation complex assembly - ATP synthase                    | 606153  |
| <i>TMEM70</i>   | Transmembrane protein 70                                               | 8         | <i>tmem70</i>       | 2             | mn0126<br>mn0127  | Tmem70          | 1         | Lactic acidosis, encephalopathy, histiocytoid cardiomyopathy, microcephaly, hypotonia, facial dysmorphism and 3-methylglutaconic aciduria psychomotor delay, hyperammonemia                                     | Mitochondrial complex V (ATP synthase) deficiency                                                          | Biogenesis of mitochondrial ATP synthase                                     | 612418  |

| Approved symbol | Approved name                                         | Human chr | Zebrafish orthologs            | Zebrafish chr | Allele designator | Mouse orthologs | Mouse chr | Clinical phenotype observed in humans                                                                                                                                                                                                                                                                                                   | Disease                                                                                       | Biological function                                                                                                   | OMIM ID |
|-----------------|-------------------------------------------------------|-----------|--------------------------------|---------------|-------------------|-----------------|-----------|-----------------------------------------------------------------------------------------------------------------------------------------------------------------------------------------------------------------------------------------------------------------------------------------------------------------------------------------|-----------------------------------------------------------------------------------------------|-----------------------------------------------------------------------------------------------------------------------|---------|
| <i>COQ2</i>     | Coenzyme Q2, Polyprenyltransferase                    | 4         | <i>coq2</i>                    | 5             | mn0106            | Coq2            | 5         | Multiple system atrophy, unsteadiness of gait, nystagmus, gait ataxia, dysarthria, speech difficulty, dysmetria, lactic acidosis, urinary dysfunction and nystagmus                                                                                                                                                                     | Coenzyme Q10 deficiency, primary; Multiple system atrophy                                     | Biosynthesis of CoQ, coenzyme in mitochondrial respiratory chain                                                      | 609825  |
| <i>PDSS2</i>    | Decaprenyl diphosphate synthase subunit 2             | 6         | <i>pdss2</i>                   | 13            | mn0120            | Pdss2           | 10        | Hypotonia, seizures, cortical blindness, lactic acidosis, encephalopathy and nephrotic syndrome                                                                                                                                                                                                                                         | Coenzyme Q10 deficiency                                                                       | Involved in biosynthesis of coenzyme Q                                                                                | 610564  |
| <i>MICU1</i>    | Mitochondrial calcium uptake 1                        | 10        | <i>micu1</i>                   | 13            | mn0132            | Micu1           | 10        | Proximal muscle weakness and learning disabilities                                                                                                                                                                                                                                                                                      | Myopathy with extrapyramidal signs                                                            | Regulator of mitochondrial calcium uptake                                                                             | 605084  |
| <i>SMDT1</i>    | Single-pass membrane protein with aspartate rich tail | 22        | <i>smdt1a</i><br><i>smdt1b</i> | 3<br>1        | mn0122            | Smdt1           | 15        | -na-                                                                                                                                                                                                                                                                                                                                    | -na-                                                                                          | Core regulatory subunit of calcium channel in mitochondrial inner membrane                                            | 615588  |
| <i>MCU</i>      | Mitochondrial calcium uniporter                       | 10        | <i>mcu</i>                     | 13            | mn0111            | Mcu             | 10        | -na-                                                                                                                                                                                                                                                                                                                                    | -na-                                                                                          | Calcium transporter and mediates calcium uptake in mitochondria                                                       | 614197  |
| <i>TK2</i>      | Thymidine kinase 2, mitochondrial                     | 16        | <i>tk2</i>                     | 7             | mn0125            | Tk2             | 8         | Infantile onset fetal encephalomyopathy, failure to thrive, muscle weakness, mild facial weakness, myopathy, axonal neuropathy, brain atrophy, hypertrophic cardiomyopathy, regression of motor development, psychomotor arrest, dysphonia, dysphagia, ptosis, impaired gait, bilateral ptosis, hypotonia, lactic acidosis and epilepsy | Progressive external ophthalmoplegia; Mitochondrial DNA depletion syndrome 2 (myopathic type) | Required for mitochondrial DNA synthesis                                                                              | 188250  |
| <i>LRPPRC</i>   | Leucine rich pentatricopeptide repeat containing      | 2         | <i>lrpprc</i>                  | 13            | mn0235gt          | Lrpprc          | 17        | Delayed psychomotor development, mental retardation, mild dysmorphic facial features, hypotonia, ataxia, and the development of lesions in the brainstem and basal ganglia, seizures, dysphagia and hypertrophic cardiomyopathy                                                                                                         | Leigh syndrome, French-Canadian type                                                          | Involved in translation of mitochondrial encoded cox subunits and mediation of folding of mitochondrial transcriptome | 607544  |
| <i>MTFMT</i>    | Mitochondrial methionyl-tRNA formyltransferase        | 15        | <i>mtfmt</i>                   | 7             | mn0114<br>mn0115  | Mtfmt           | 9         | Psychomotor developmental delay, renal dysplasia, mild facial dysarthria and ataxia                                                                                                                                                                                                                                                     | Combined oxidative phosphorylation deficiency                                                 | Catalyzes the formylation of methionyl-tRNA                                                                           | 611766  |
| <i>MRPS18B</i>  | Mitochondrial ribosomal protein S18B                  | 6         | <i>mrps18b</i>                 | 19            | mn0425gt          | Mrps18b         | 17        | -na-                                                                                                                                                                                                                                                                                                                                    | -na-                                                                                          | Part of small 28S subunit of mitoribosome                                                                             | 611982  |



| Approved symbol | Approved name                                        | Human chr | Zebrafish orthologs          | Zebrafish chr | Allele designator | Mouse orthologs | Mouse chr | Clinical phenotype observed in humans                                      | Disease                                                                  | Biological function                                                                                                 | OMIM ID |
|-----------------|------------------------------------------------------|-----------|------------------------------|---------------|-------------------|-----------------|-----------|----------------------------------------------------------------------------|--------------------------------------------------------------------------|---------------------------------------------------------------------------------------------------------------------|---------|
| <i>TIMM50</i>   | Translocase of inner mitochondrial membrane 50       | 19        | <i>timm50</i>                | 15            | mn0906gt          | Timm50          | 7         | Severe intellectual disability, seizure and 3-methylglutaconic aciduria    | 3-methylglutaconic aciduria, type IX; Mitochondrial complex V deficiency | Subunit of TIM23 inner mitochondrial membrane complex and recognizes mitochondrial targeting signal or pre-sequence | 607381  |
| <i>OGDH</i>     | Oxoglutarate dehydrogenase                           | 7         | <i>ogdha</i><br><i>ogdhb</i> | 8<br>10       | mn0281gt          | Ogdh            | 11        | Colorectal cancer                                                          | Alpha-ketoglutarate dehydrogenase deficiency                             | Catalyzes the conversion of 2-oxoglutarate to succinyl-CoA and CO <sub>2</sub>                                      | 613022  |
| <i>IDH2</i>     | Isocitrate dehydrogenase (NADP (+)) 2, mitochondrial | 15        | <i>idh2</i>                  | 18            | mn0268gt          | Idh2            | 7         | Acute myeloid leukemia and abnormal production of D-2-hydroxyglutaric acid | D-2-hydroxyglutaric aciduria 2                                           | Catalyzes the conversion of isocitrate to 2-oxoglutarate                                                            | 147650  |

274

## 275 TALEN- and GBT-mediated targeting of nuclear-encoded mitochondrial genes

276 Amino acid analysis using protein-protein BLAST functions between the wild type human, wild  
277 type zebrafish, and mutant zebrafish sequences showed consistent results between the three  
278 conditions. The comparison of wild type human and wild type zebrafish sequences showed high  
279 areas of homology following the mitochondrial targeting domain in almost every gene, with 80-  
280 100% similarity in catalytic or active domains of the transcripts. Analysis of the mutant zebrafish  
281 and human wild type comparison showed a range of difference with predicted frameshift  
282 mutations leading to truncation of the protein very early in the transcript (**Figure 3A-X**). Of the  
283 alleles created by TALEN mutagenesis in the MMC collection, all but one (*micu1*) showed a  
284 predicted frameshift mutation leading to a truncation event immediately following the NHEJ-  
285 mediated insertion or deletion. The GBT mutants showed high levels of homology prior to the  
286 transposon integration site followed by a nearly complete loss of normal transcript levels  
287 following splicing into the GBT cassette.

288

## 289 **Discussion**

290 In a multicellular organism, each cell is able to carry out its functions due to well-orchestrated  
291 cross-talk between the nuclear and mitochondrial genomes. Many mitochondrial functions like  
292 energy production, genome maintenance, ion/metabolite homeostasis, membrane dynamics and  
293 transport of biomolecules can be attributed to approximately 1158 known nuclear proteins  
294 residing in the mitochondria [24,27]. Due to advancements in proteomic technologies in recent  
295 years, there has been a surge in documentation of many characterized and uncharacterized  
296 mitochondrial proteins. However, correlation between mitochondrial localization of these  
297 proteins and their physiological significance in disease progression remains largely unexplored.  
298 Out of the 1158 nuclear encoded proteins, only 245 have functional evidence in mitochondrial  
299 clinical manifestations [39]. For the remaining 913 proteins, mitochondrial involvement in  
300 disease progression has yet to be demonstrated. The obstacles in mitochondrial genetic research,  
301 and thus delays in finding effective treatments, are primarily due to the limited tools available to  
302 mitochondrial researchers, specifically the small number of available model systems and  
303 animals.

304 Most mitochondrial research thus far has made use of model systems that each present their own  
305 unique challenge to accurate study of human disease. Yeast, one of the most common laboratory  
306 eukaryotes, have been incredibly useful in mitochondrial research, but unlike humans and other  
307 animals they lack complex I [45]. Complex 1 deficiency is the most frequent among  
308 mitochondrial disorders caused by mutations in 28 out of 48 genes contributing to its assembly  
309 and biogenesis [84]. Also, complex 1 is responsible for the most ROS generation, which acts as a  
310 cue in various signaling pathways [85].

311 Human cell culture has been valuable in exploring mitochondrial disease models, principally  
312 through cytoplasmic hybrids that are made by replacing the mitochondria of an immortalized cell  
313 line with mutated patient mitochondria [86–89]. However, while these cells are a more faithful  
314 representation of human mitochondrial activity than yeast, they have different barriers to  
315 accuracy. First, immortalized cells, and cultured cells in general, often have modified metabolic  
316 pathways compared to cells *in vivo*. Second, as is common to all cell culture research, cells in a  
317 dish cannot accurately represent the complex interactions and systems biology inherent to a  
318 complete organism.

319 In this study, we aim to support the establishment of the zebrafish as a complementary animal  
320 model for understanding the role of nuclear-encoded mitochondrial proteins in biology and the  
321 pathophysiology of mitochondrial disorders. We propose that zebrafish can be an excellent  
322 model organism to study mitochondrial biology primarily because of their conserved genome,  
323 codon bias and synteny. Other advantages include their amenability to genetic manipulation and  
324 optical clarity, which facilitates direct observation. New gene editing techniques such as  
325 TALENs and CRISPRs have aided in the development of humanized disease models in  
326 organisms such as zebrafish, mice, and even pigs [90–97].

327 The MMC collection described here encompasses mutations in 24 different nuclear-encoded  
328 genes related to mitochondrial function enabling a diverse study of the important roles the  
329 mitochondria play in cellular biology. The collection includes mutants in all five complexes of  
330 the electron transport chain as well as many other crucial pathways related to protein transport,  
331 metabolite synthesis, mtDNA replication and expression, and calcium homeostasis. The first set  
332 of mutants were created using custom gene editing to exons coding for critical functional  
333 domains of the protein product. These domains were targeted because they shared high levels of

334 homology to their human ortholog. The second group of mutants consisted of fish that had been  
335 injected with a protein trap transposon system that truncates the expected protein products as  
336 well as sorting and imaging through fluorescent expression patterns *in vivo*. Included here, we  
337 have curated small group of mutants where the GBT integrated into a mitochondrial gene of  
338 interest.

339 In recent years zebrafish have been used to understand the pathophysiology of human  
340 mitochondrial disorders such as cardiovascular, multisystemic, neurological, and erythropoiesis,  
341 to name a few. Studies for loss of function have been carried out to model left ventricular non-  
342 compaction, a genetically heterogeneous cardiomyopathy caused by mutations in nicotinamide  
343 nucleotide transhydrogenase (*NNT*) gene [98,99]. Transiently suppressing the levels of *nnt* gene  
344 did mirror the symptoms, such as early ventricular malformation and contractility defects,  
345 observed in human patients [99]. Transient suppression of *ndufb11* protein in zebrafish results in  
346 cardiac anomalies, confirming the role of *NDUFB11* in histiocytoid cardiomyopathy  
347 pathogenesis [41].

348 Parkinson disease (PD) is another example where *parkin* and *pink* knockdown larvae display  
349 mitochondrial fragmentation accompanied by accumulation of oxidative species, mimicking the  
350 phenotype observed in PD patients. Loss of dendritic arborization and peripheral neurons were  
351 also observed in the knockdown animals [72,100–103]. The zebrafish model of Dravet syndrome  
352 shows altered metabolism associated with the pathophysiology [104]. Downregulation of the  
353 sodium channel, voltage-gated, type I like, alpha b (*scn1lab*) in zebrafish leads to mitochondrial  
354 structural abnormalities accompanied by accumulation of oxidative species [104–106].

355 Sideroblastic anemia, caused by mutations in mitoferrin (*mfrn1*) gene, has been successfully  
356 modelled in zebrafish [107]. The elucidation of its role in zebrafish as iron importer does shed

357 some light on iron related defects in progression of anemia, accompanied by mitochondrial  
358 dysfunction. Zebrafish erythrocytes are nucleated and possess organelles such as mitochondria  
359 [108] in their cytoplasm, making them an ideal model organism to study ribosomopathies and  
360 hematological malignancies [109–114]. Mitochondria in erythrocytes may offer valuable insight  
361 into novel biological pathways resident in mitochondria.

362 Transient infantile liver failure and mitochondrial deafness, caused by mutations in tRNA 5-  
363 methylaminomethyl-2-thiouridylate methyltransferase (*TRMU*) gene [115] have been  
364 phenocopied in zebrafish [116]. Zebrafish *trmu* mutants exhibit abnormal mitochondrial  
365 morphology, deficient oxidative phosphorylation, defects in hair cells and decreases in the steady  
366 state levels of mt-tRNAs, resembling the observations made in patients suffering from this  
367 syndrome [116].

368 Taking cues from these studies, many of the genes selected here were prioritized on the basis of  
369 the mutations and clinical phenotype reported in patients. Detailed phenotypic analyses will be  
370 described in subsequent studies. The zebrafish mutants encode for genes that have been involved  
371 in myriad of clinical phenotypes such as encephalopathy, nephrotic syndrome, intellectual  
372 disability, psychomotor developmental delay, respiratory chain deficiency, lactic acidosis, iron  
373 overload, microcephaly, hypertrophic cardiomyopathy, etc. The superficial investigations of the  
374 tissue-specific phenotypes associated with, for example, housekeeping nuclear encoded proteins,  
375 have to be refined with organelle level investigations. The repository of mutants encoding for  
376 proteins involved in respiratory chain biogenesis and assembly offers the potential to understand  
377 the moonlighting role of these proteins. Mutations in these proteins are associated with organ-  
378 specific phenotypes such as neurological, paraganglioma, cardiovascular etc. [41,117]. Extensive  
379 energy demand by these tissues is one possible explanation for the progression of these

380 manifestations; however, the role of these proteins in organ-specific cellular niches or  
381 homeostasis is also a possibility. These models can help to decipher the role of these proteins in  
382 the mitochondrial interactome, when studied *in vivo*. This underpins the utility of this MMC  
383 collection in deciphering the role of mitochondrial proteins in tissue-specific biological  
384 pathways.

385 Zebrafish are also amenable to small molecule mediated pharmacological modelling of  
386 mitochondrial phenotypes. To test hypoxia as a potential protective therapy in mitochondrial  
387 disorders, Von Hippel-Lindau (*vhl*) null mutant zebrafish, when treated with antimycin mediated  
388 mitochondrial insult, exhibited improved survival. In addition, FG-4592 was found to improve  
389 survival in response to respiratory chain inhibition, possibly due to increase in hypoxia response  
390 [118]. A series of ETC complex specific pharmacological inhibitors such as rotenone (complex  
391 I), azide (complex IV), oligomycin (complex V) and chloramphenicol (mitochondrial protein  
392 translation) have been used to model respiratory chain dysfunction in zebrafish [78,119,120].  
393 Zebrafish larvae display a series of phenotypes, such as developmental arrest, when treated with  
394 rotenone. Treatment with azide induced decreased heart rate, loss of motor function, inability to  
395 respond to tactical stimulation, neurological damage and mortality. Organ specific manifestations  
396 such as neurological and behavioral dysfunction have been reported in 6-7 days post fertilization  
397 (dpf) zebrafish larvae upon administration of a titred drug concentration [120]. These  
398 observations tilt the scales in favor of zebrafish for modeling mitochondrial clinical  
399 manifestations. Gaining insights from these studies, our compendium of mutants provides an  
400 excellent resource to test a large number of biological and chemical modulators as potential  
401 therapies for mitochondrial disorders for which treatment remains elusive.

402 Zebrafish offer many unique advantages for *in vivo* imaging experiments, as compared to their  
403 mammalian counterparts. A classical study corroborating this advantage is *in vivo* imaging of  
404 mitochondrial transport in a single axon, as demonstrated by Yang and his colleagues [121].  
405 Seok and his colleagues generated a transgenic zebrafish line, expressing green fluorescent  
406 protein fused to mitochondrial localization sequence from cytochrome c oxidase [71].  
407 Mitochondrial function is often measured by various parameters such as estimation of membrane  
408 potential, mitochondrial superoxide species and energy production. Superoxide activity and  
409 membrane potential in zebrafish has been measured by employing the use of cell permeable  
410 chemical probes such as MitoSox [122] and Dihydrorhodamine 123 (DH123) [73], respectively.  
411 Zebrafish transgenic lines expressing genetically encoded calcium and oxidation indicators, have  
412 also served as an excellent model to measure calcium homeostasis and oxidative status *in vivo* in  
413 models of mechanosensory hair cell damage and death [123]. Constructs such as Mitotimer allow  
414 the measurement of mitochondrial turnover, transport, and changes in the redox history of  
415 mitochondria during organogenesis events in zebrafish embryos [124]. This transgenic model  
416 enables a sweeping picture of the mitochondrial network, helping in studying cellular processes  
417 such as mitophagy and apoptosis.

418 Zebrafish have also provided novel mechanistic insights to interrogate the mitochondrial  
419 dynamics, to be called as “*in-vivo* life cycle of mitochondria” in healthy and diseased conditions  
420 [124]. One such example is that of Mitofish [74], that recapitulates mitochondrial network  
421 biogenesis, unraveling the role of the organelle in cell-type specific niches of different organ  
422 systems. Mitofish is a transgenic zebrafish line that fluorescently labels the mitochondria in the  
423 neurons, enabling non-invasive *in vivo* observation. Advancement in adaptive optics and lattice  
424 light sheet microscopy have empowered researchers to look at vibrant and colorful images of

425 organelles in zebrafish. These technologies have been applied in investigating the organellar  
426 dynamics in brain during early development and in the eye of an adult zebrafish [125]. These  
427 MMMC mutants provide an excellent platform to study mitochondrial remodeling and  
428 homeostasis in the progression of various clinical disorders by mapping the mitochondrial wiring  
429 of the cell.

430 These zebrafish mutants have been cryopreserved for the purpose of sharing the lines as a  
431 resource with the field for expanding the study of mitochondrial genetics and biology. In  
432 addition, our template for the creation of mitochondrial mutants in zebrafish should enable the  
433 creation of higher animal models of specific variants of interest. For the purpose of accelerating  
434 this research, all lines in this project have had their information deposited with ZIRC, and all of  
435 the lines have been made available via zfishbook ([www.zfishbook.com](http://www.zfishbook.com)) [83].

436 The goal of this study is to disseminate the use of zebrafish as a *noblesse oblige* in the field of  
437 mitochondrial biology and medicine, paving way for the development of novel insight for  
438 diagnostic and therapeutic strategies. Ultimately, using this collection of mutants we hope to  
439 unravel a small part of the mystery that shrouds one of the most crucial organelles in the  
440 cell. We hope that this MMMC mutant collection and the primer we provide for adding to it,  
441 will help to usher in a new mitochondrial research using the zebrafish.

## 442 **Acknowledgements**

443 The authors thank Dr. Eric Schon and Dr. Vamsi Mootha for helping select the gene set targeted  
444 in this collection, and the following who contributed to the generation of these new zebrafish  
445 lines including Alexandra Cook, Roberto Lopez Cervera, and the Mayo Clinic Zebrafish Facility  
446 staff. Gabriel Martinez Galvez helped with paper illustration design. This work was sponsored



447 by the Mayo Foundation, a gift by the Marriott Foundation and by NIH grants DK84567,  
448 GM63904 and HG006431 to SCE.

#### 449 **Author Contributions**

450 The paper was written by AS, MW, ZWJ and SCE. Experiments were executed by JMC, MW,  
451 HA, NI, MDU, JDB, RMH, WL, YD and TLP with experimental guidance from XX, KJC and  
452 SCE. Data analysis was completed by JMC, NI, JDB, MDU, RMH, MW, WL, YD and AS.

#### 453 **References**

- 454 1. Andersson SG, Zomorodipour A, Andersson JO, Sicheritz-Ponten T, Alsmark UC,  
455 Podowski RM, et al. The genome sequence of *Rickettsia prowazekii* and the origin of  
456 mitochondria. *Nature*. England; 1998;396: 133–140. doi:10.1038/24094
- 457 2. Muller M, Martin W. The genome of *Rickettsia prowazekii* and some thoughts on the  
458 origin of mitochondria and hydrogenosomes. *Bioessays*. United States; 1999;21: 377–381.  
459 doi:10.1002/(SICI)1521-1878(199905)21:5<377::AID-BIES4>3.0.CO;2-W
- 460 3. Gray MW, Burger G, Lang BF. Mitochondrial evolution. *Science*. United States;  
461 1999;283: 1476–1481.
- 462 4. Thorsness PE, Weber ER. Escape and migration of nucleic acids between chloroplasts,  
463 mitochondria, and the nucleus. *Int Rev Cytol*. United States; 1996;165: 207–234.
- 464 5. Lynch M, Koskella B, Schaack S. Mutation pressure and the evolution of organelle  
465 genomic architecture. *Science*. United States; 2006;311: 1727–1730.  
466 doi:10.1126/science.1118884
- 467 6. Vafai SB, Mootha VK. Mitochondrial disorders as windows into an ancient organelle.

- 468 Nature. England; 2012;491: 374–383. doi:10.1038/nature11707
- 469 7. Elson JL, Samuels DC, Turnbull DM, Chinnery PF. Random intracellular drift explains  
470 the clonal expansion of mitochondrial DNA mutations with age. *Am J Hum Genet.* United  
471 States; 2001;68: 802–806. doi:10.1086/318801
- 472 8. DiMauro S, Hirano M. Mitochondrial DNA Deletion Syndromes. In: Adam MP, Ardinger  
473 HH, Pagon RA, Wallace SE, Bean LJH, Stephens K, et al., editors. Seattle (WA); 1993.
- 474 9. Wallace DC. Mitochondrial DNA mutations in disease and aging. *Environ Mol Mutagen.*  
475 United States; 2010;51: 440–450. doi:10.1002/em.20586
- 476 10. Elson JL, Smith PM, Greaves LC, Lightowlers RN, Chrzanowska-Lightowlers ZMA,  
477 Taylor RW, et al. The presence of highly disruptive 16S rRNA mutations in clinical  
478 samples indicates a wider role for mutations of the mitochondrial ribosome in human  
479 disease. *Mitochondrion.* Netherlands; 2015;25: 17–27. doi:10.1016/j.mito.2015.08.004
- 480 11. Andrews RM, Kubacka I, Chinnery PF, Lightowlers RN, Turnbull DM, Howell N.  
481 Reanalysis and revision of the Cambridge reference sequence for human mitochondrial  
482 DNA. *Nature genetics.* United States; 1999. p. 147. doi:10.1038/13779
- 483 12. Broughton RE, Milam JE, Roe BA. The complete sequence of the zebrafish (*Danio rerio*)  
484 mitochondrial genome and evolutionary patterns in vertebrate mitochondrial DNA.  
485 *Genome Res.* United States; 2001;11: 1958–1967. doi:10.1101/gr.156801
- 486 13. Wolstenholme DR. Animal mitochondrial DNA: structure and evolution. *Int Rev Cytol.*  
487 United States; 1992;141: 173–216.
- 488 14. Osawa S, Jukes TH, Watanabe K, Muto A. Recent evidence for evolution of the genetic

- 489 code. *Microbiol Rev.* United States; 1992;56: 229–264.
- 490 15. Richter R, Pajak A, Dennerlein S, Rozanska A, Lightowlers RN, Chrzanowska-  
491 Lightowlers ZMA. Translation termination in human mitochondrial ribosomes. *Biochem*  
492 *Soc Trans.* England; 2010;38: 1523–1526. doi:10.1042/BST0381523
- 493 16. Bayona-Bafaluy MP, Blits B, Battersby BJ, Shoubridge EA, Moraes CT. Rapid directional  
494 shift of mitochondrial DNA heteroplasmy in animal tissues by a mitochondrially targeted  
495 restriction endonuclease. *Proc Natl Acad Sci U S A.* United States; 2005;102: 14392–  
496 14397. doi:10.1073/pnas.0502896102
- 497 17. Srivastava S, Moraes CT. Double-strand breaks of mouse muscle mtDNA promote large  
498 deletions similar to multiple mtDNA deletions in humans. *Hum Mol Genet.* England;  
499 2005;14: 893–902. doi:10.1093/hmg/ddi082
- 500 18. Nissanka N, Minczuk M, Moraes CT. Mechanisms of Mitochondrial DNA Deletion  
501 Formation. *Trends Genet.* England; 2019; doi:10.1016/j.tig.2019.01.001
- 502 19. Alexeyev M, Shokolenko I, Wilson G, LeDoux S. The maintenance of mitochondrial  
503 DNA integrity--critical analysis and update. *Cold Spring Harb Perspect Biol.* United  
504 States; 2013;5: a012641. doi:10.1101/cshperspect.a012641
- 505 20. Zinovkina LA. Mechanisms of Mitochondrial DNA Repair in Mammals. *Biochemistry*  
506 (Mosc). United States; 2018;83: 233–249. doi:10.1134/S0006297918030045
- 507 21. Patananan AN, Wu T-H, Chiou P-Y, Teitell MA. Modifying the Mitochondrial Genome.  
508 *Cell Metab.* United States; 2016;23: 785–796. doi:10.1016/j.cmet.2016.04.004
- 509 22. Gammage PA, Moraes CT, Minczuk M. Mitochondrial Genome Engineering: The

- 510 Revolution May Not Be CRISPR-Ized. *Trends Genet.* England; 2018;34: 101–110.  
511 doi:10.1016/j.tig.2017.11.001
- 512 23. Lopez MF, Kristal BS, Chernokalskaya E, Lazarev A, Shestopalov AI, Bogdanova A, et  
513 al. High-throughput profiling of the mitochondrial proteome using affinity fractionation  
514 and automation. *Electrophoresis.* Germany; 2000;21: 3427–3440. doi:10.1002/1522-  
515 2683(20001001)21:16<3427::AID-ELPS3427>3.0.CO;2-L
- 516 24. Pagliarini DJ, Calvo SE, Chang B, Sheth SA, Vafai SB, Ong S-E, et al. A mitochondrial  
517 protein compendium elucidates complex I disease biology. *Cell.* United States; 2008;134:  
518 112–123. doi:10.1016/j.cell.2008.06.016
- 519 25. Elstner M, Andreoli C, Klopstock T, Meitinger T, Prokisch H. The mitochondrial  
520 proteome database: MitoP2. *Methods Enzymol.* United States; 2009;457: 3–20.  
521 doi:10.1016/S0076-6879(09)05001-0
- 522 26. Smith AC, Robinson AJ. MitoMiner, an integrated database for the storage and analysis of  
523 mitochondrial proteomics data. *Mol Cell Proteomics.* United States; 2009;8: 1324–1337.  
524 doi:10.1074/mcp.M800373-MCP200
- 525 27. Calvo SE, Clauser KR, Mootha VK. MitoCarta2.0: an updated inventory of mammalian  
526 mitochondrial proteins. *Nucleic Acids Res.* England; 2016;44: D1251-7.  
527 doi:10.1093/nar/gkv1003
- 528 28. Taylor RW, Turnbull DM. Mitochondrial DNA mutations in human disease. *Nat Rev*  
529 *Genet.* England; 2005;6: 389–402. doi:10.1038/nrg1606
- 530 29. Rossignol R, Faustin B, Rocher C, Malgat M, Mazat J-P, Letellier T. Mitochondrial

- 531 threshold effects. *Biochem J. England*; 2003;370: 751–762. doi:10.1042/BJ20021594
- 532 30. Chinnery PF. Mitochondrial Disorders Overview. In: Adam MP, Ardinger HH, Pagon RA,  
533 Wallace SE, Bean LJH, Stephens K, et al., editors. Seattle (WA); 1993.
- 534 31. Gorman GS, Chinnery PF, DiMauro S, Hirano M, Koga Y, McFarland R, et al.  
535 Mitochondrial diseases. *Nature reviews. Disease primers. England*; 2016. p. 16080.  
536 doi:10.1038/nrdp.2016.80
- 537 32. Skladal D, Halliday J, Thorburn DR. Minimum birth prevalence of mitochondrial  
538 respiratory chain disorders in children. *Brain. England*; 2003;126: 1905–1912.  
539 doi:10.1093/brain/awg170
- 540 33. Schaefer AM, McFarland R, Blakely EL, He L, Whittaker RG, Taylor RW, et al.  
541 Prevalence of mitochondrial DNA disease in adults. *Ann Neurol. United States*; 2008;63:  
542 35–39. doi:10.1002/ana.21217
- 543 34. Wallace DC, Singh G, Lott MT, Hodge JA, Schurr TG, Lezza AM, et al. Mitochondrial  
544 DNA mutation associated with Leber’s hereditary optic neuropathy. *Science. United*  
545 *States*; 1988;242: 1427–1430.
- 546 35. Swerdlow RH, Wooten GF. A novel deafness/dystonia peptide gene mutation that causes  
547 dystonia in female carriers of Mohr-Tranebjaerg syndrome. *Ann Neurol. United States*;  
548 2001;50: 537–540.
- 549 36. Garone C, Tadesse S, Hirano M. Clinical and genetic spectrum of mitochondrial  
550 neurogastrointestinal encephalomyopathy. *Brain. England*; 2011;134: 3326–3332.  
551 doi:10.1093/brain/awr245

- 552 37. Urrutia PJ, Mena NP, Nunez MT. The interplay between iron accumulation, mitochondrial  
553 dysfunction, and inflammation during the execution step of neurodegenerative disorders.  
554 *Front Pharmacol. Switzerland*; 2014;5: 38. doi:10.3389/fphar.2014.00038
- 555 38. Singh RK, Saini S, Verma D, Kalaiarasan P, Bamezai RNK. Mitochondrial ND5 mutation  
556 mediated elevated ROS regulates apoptotic pathway epigenetically in a P53 dependent  
557 manner for generating pro-cancerous phenotypes. *Mitochondrion. Netherlands*; 2017;35:  
558 35–43. doi:10.1016/j.mito.2017.05.001
- 559 39. Craven L, Alston CL, Taylor RW, Turnbull DM. Recent Advances in Mitochondrial  
560 Disease. *Annu Rev Genomics Hum Genet. United States*; 2017;18: 257–275.  
561 doi:10.1146/annurev-genom-091416-035426
- 562 40. Ghezzi D, Saada A, D’Adamo P, Fernandez-Vizarra E, Gasparini P, Tiranti V, et al.  
563 FASTKD2 nonsense mutation in an infantile mitochondrial encephalomyopathy  
564 associated with cytochrome c oxidase deficiency. *Am J Hum Genet. United States*;  
565 2008;83: 415–423. doi:10.1016/j.ajhg.2008.08.009
- 566 41. Shehata BM, Cundiff CA, Lee K, Sabharwal A, Lalwani MK, Davis AK, et al. Exome  
567 sequencing of patients with histiocytoid cardiomyopathy reveals a de novo NDUFB11  
568 mutation that plays a role in the pathogenesis of histiocytoid cardiomyopathy. *Am J Med  
569 Genet A. United States*; 2015;167A: 2114–2121. doi:10.1002/ajmg.a.37138
- 570 42. Wesolowska M, Gorman GS, Alston CL, Pajak A, Pyle A, He L, et al. Adult Onset Leigh  
571 Syndrome in the Intensive Care Setting: A Novel Presentation of a C12orf65 Related  
572 Mitochondrial Disease. *J Neuromuscul Dis. Netherlands*; 2015;2: 409–419.  
573 doi:10.3233/JND-150121

- 574 43. Floyd BJ, Wilkerson EM, Veling MT, Minogue CE, Xia C, Beebe ET, et al.  
575 Mitochondrial Protein Interaction Mapping Identifies Regulators of Respiratory Chain  
576 Function. *Mol Cell*. United States; 2016;63: 621–632. doi:10.1016/j.molcel.2016.06.033
- 577 44. Kohda M, Tokuzawa Y, Kishita Y, Nyuzuki H, Moriyama Y, Mizuno Y, et al. A  
578 Comprehensive Genomic Analysis Reveals the Genetic Landscape of Mitochondrial  
579 Respiratory Chain Complex Deficiencies. *PLoS Genet*. United States; 2016;12: e1005679.  
580 doi:10.1371/journal.pgen.1005679
- 581 45. Boumans H, Grivell LA, Berden JA. The respiratory chain in yeast behaves as a single  
582 functional unit. *J Biol Chem*. United States; 1998;273: 4872–4877.
- 583 46. Schwimmer C, Rak M, Lefebvre-Legendre L, Duvezin-Caubet S, Plane G, di Rago J-P.  
584 Yeast models of human mitochondrial diseases: from molecular mechanisms to drug  
585 screening. *Biotechnol J*. Germany; 2006;1: 270–281. doi:10.1002/biot.200500053
- 586 47. Altmann K, Durr M, Westermann B. *Saccharomyces cerevisiae* as a model organism to  
587 study mitochondrial biology: general considerations and basic procedures. *Methods Mol*  
588 *Biol*. United States; 2007;372: 81–90. doi:10.1007/978-1-59745-365-3\_6
- 589 48. Denoth Lippuner A, Julou T, Barral Y. Budding yeast as a model organism to study the  
590 effects of age. *FEMS Microbiol Rev*. England; 2014;38: 300–325. doi:10.1111/1574-  
591 6976.12060
- 592 49. Addo MG, Cossard R, Pichard D, Obiri-Danso K, Rotig A, Delahodde A. *Caenorhabditis*  
593 *elegans*, a pluricellular model organism to screen new genes involved in mitochondrial  
594 genome maintenance. *Biochim Biophys Acta*. Netherlands; 2010;1802: 765–773.  
595 doi:10.1016/j.bbadis.2010.05.007

- 596 50. Harrington AJ, Hamamichi S, Caldwell GA, Caldwell KA. *C. elegans* as a model  
597 organism to investigate molecular pathways involved with Parkinson's disease. *Dev Dyn.*  
598 United States; 2010;239: 1282–1295. doi:10.1002/dvdy.22231
- 599 51. Moreno-Arriola E, Cardenas-Rodriguez N, Coballase-Urrutia E, Pedraza-Chaverri J,  
600 Carmona-Aparicio L, Ortega-Cuellar D. *Caenorhabditis elegans*: A useful model for  
601 studying metabolic disorders in which oxidative stress is a contributing factor. *Oxid Med*  
602 *Cell Longev.* United States; 2014;2014: 705253. doi:10.1155/2014/705253
- 603 52. Tissenbaum HA. Using *C. elegans* for aging research. *Invertebr Reprod Dev.* England;  
604 2015;59: 59–63. doi:10.1080/07924259.2014.940470
- 605 53. Sanchez-Martinez A, Luo N, Clemente P, Adan C, Hernandez-Sierra R, Ochoa P, et al.  
606 Modeling human mitochondrial diseases in flies. *Biochim Biophys Acta.* Netherlands;  
607 2006;1757: 1190–1198. doi:10.1016/j.bbabi.2006.05.008
- 608 54. Fernandez-Moreno MA, Farr CL, Kaguni LS, Garesse R. *Drosophila melanogaster* as a  
609 model system to study mitochondrial biology. *Methods Mol Biol.* United States;  
610 2007;372: 33–49. doi:10.1007/978-1-59745-365-3\_3
- 611 55. Guo M. *Drosophila* as a model to study mitochondrial dysfunction in Parkinson's disease.  
612 *Cold Spring Harb Perspect Med.* United States; 2012;2. doi:10.1101/cshperspect.a009944
- 613 56. Sen A, Cox RT. Fly Models of Human Diseases: *Drosophila* as a Model for  
614 Understanding Human Mitochondrial Mutations and Disease. *Curr Top Dev Biol.* United  
615 States; 2017;121: 1–27. doi:10.1016/bs.ctdb.2016.07.001
- 616 57. Lightowers RN, Rozanska A, Chrzanowska-Lightowers ZM. Mitochondrial protein



- 617 synthesis: figuring the fundamentals, complexities and complications, of mammalian  
618 mitochondrial translation. *FEBS Lett.* England; 2014;588: 2496–2503.  
619 doi:10.1016/j.febslet.2014.05.054
- 620 58. Pett W, Lavrov D V. Cytonuclear Interactions in the Evolution of Animal Mitochondrial  
621 tRNA Metabolism. *Genome Biol Evol.* England; 2015;7: 2089–2101.  
622 doi:10.1093/gbe/evv124
- 623 59. Lavrov D V, Pett W. Animal Mitochondrial DNA as We Do Not Know It: mt-Genome  
624 Organization and Evolution in Nonbilaterian Lineages. *Genome Biol Evol.* England;  
625 2016;8: 2896–2913. doi:10.1093/gbe/evw195
- 626 60. Brown WM, George MJ, Wilson AC. Rapid evolution of animal mitochondrial DNA.  
627 *Proc Natl Acad Sci U S A.* United States; 1979;76: 1967–1971.
- 628 61. Moyes CD, Suarez RK, Hochachka PW, Ballantyne JS. A comparison of fuel preferences  
629 of mitochondria from vertebrates and invertebrates. *Can J Zool.* NRC Research Press;  
630 1990;68: 1337–1349. doi:10.1139/z90-201
- 631 62. Grossman LI, Wildman DE, Schmidt TR, Goodman M. Accelerated evolution of the  
632 electron transport chain in anthropoid primates. *Trends Genet.* England; 2004;20: 578–  
633 585. doi:10.1016/j.tig.2004.09.002
- 634 63. Gershoni M, Fuchs A, Shani N, Fridman Y, Corral-Debrinski M, Aharoni A, et al.  
635 Coevolution predicts direct interactions between mtDNA-encoded and nDNA-encoded  
636 subunits of oxidative phosphorylation complex i. *J Mol Biol.* England; 2010;404: 158–  
637 171. doi:10.1016/j.jmb.2010.09.029

- 638 64. Haen KM, Pett W, Lavrov D V. Parallel loss of nuclear-encoded mitochondrial  
639 aminoacyl-tRNA synthetases and mtDNA-encoded tRNAs in Cnidaria. *Mol Biol Evol.*  
640 United States; 2010;27: 2216–2219. doi:10.1093/molbev/msq112
- 641 65. Rea SL, Graham BH, Nakamaru-Ogiso E, Kar A, Falk MJ. Bacteria, yeast, worms, and  
642 flies: exploiting simple model organisms to investigate human mitochondrial diseases.  
643 *Dev Disabil Res Rev.* United States; 2010;16: 200–218. doi:10.1002/ddrr.114
- 644 66. Kuzmenko A V, Levitskii SA, Vinogradova EN, Atkinson GC, Hauryliuk V, Zenkin N, et  
645 al. Protein biosynthesis in mitochondria. *Biochemistry (Mosc).* United States; 2013;78:  
646 855–866. doi:10.1134/S0006297913080014
- 647 67. Zhao J, Lendahl U, Nister M. Regulation of mitochondrial dynamics: convergences and  
648 divergences between yeast and vertebrates. *Cell Mol Life Sci.* Switzerland; 2013;70:  
649 951–976. doi:10.1007/s00018-012-1066-6
- 650 68. Lieschke GJ, Currie PD. Animal models of human disease: zebrafish swim into view. *Nat*  
651 *Rev Genet.* England; 2007;8: 353–367. doi:10.1038/nrg2091
- 652 69. Lin C-Y, Chiang C-Y, Tsai H-J. Zebrafish and Medaka: new model organisms for modern  
653 biomedical research. *J Biomed Sci.* England; 2016;23: 19. doi:10.1186/s12929-016-0236-  
654 5
- 655 70. Blanco-Sanchez B, Clement A, Phillips JB, Westerfield M. Zebrafish models of human  
656 eye and inner ear diseases. *Methods Cell Biol.* United States; 2017;138: 415–467.  
657 doi:10.1016/bs.mcb.2016.10.006
- 658 71. Kim MJ, Kang KH, Kim C-H, Choi S-Y. Real-time imaging of mitochondria in transgenic

- 659 zebrafish expressing mitochondrially targeted GFP. *Biotechniques*. England; 2008;45:  
660 331–334. doi:10.2144/000112909
- 661 72. Flinn L, Mortiboys H, Volkmann K, Koster RW, Ingham PW, Bandmann O. Complex I  
662 deficiency and dopaminergic neuronal cell loss in parkin-deficient zebrafish (*Danio rerio*).  
663 *Brain*. England; 2009;132: 1613–1623. doi:10.1093/brain/awp108
- 664 73. Song Y, Selak MA, Watson CT, Coutts C, Scherer PC, Panzer JA, et al. Mechanisms  
665 underlying metabolic and neural defects in zebrafish and human multiple acyl-CoA  
666 dehydrogenase deficiency (MADD). *PLoS One*. United States; 2009;4: e8329.  
667 doi:10.1371/journal.pone.0008329
- 668 74. Plucinska G, Paquet D, Hruscha A, Godinho L, Haass C, Schmid B, et al. In vivo imaging  
669 of disease-related mitochondrial dynamics in a vertebrate model system. *J Neurosci*.  
670 United States; 2012;32: 16203–16212. doi:10.1523/JNEUROSCI.1327-12.2012
- 671 75. Steele SL, Prykhozhiy S V, Berman JN. Zebrafish as a model system for mitochondrial  
672 biology and diseases. *Transl Res*. United States; 2014;163: 79–98.  
673 doi:10.1016/j.trsl.2013.08.008
- 674 76. Byrnes J, Ganetzky R, Lightfoot R, Tzeng M, Nakamaru-Ogiso E, Seiler C, et al.  
675 Pharmacologic modeling of primary mitochondrial respiratory chain dysfunction in  
676 zebrafish. *Neurochem Int*. England; 2017; doi:10.1016/j.neuint.2017.07.008
- 677 77. Pinho BR, Santos MM, Fonseca-Silva A, Valentao P, Andrade PB, Oliveira JMA. How  
678 mitochondrial dysfunction affects zebrafish development and cardiovascular function: an  
679 in vivo model for testing mitochondria-targeted drugs. *Br J Pharmacol*. England;  
680 2013;169: 1072–1090. doi:10.1111/bph.12186

- 681 78. Polyak E, Ostrovsky J, Peng M, Dingley SD, Tsukikawa M, Kwon YJ, et al. N-  
682 acetylcysteine and vitamin E rescue animal longevity and cellular oxidative stress in pre-  
683 clinical models of mitochondrial complex I disease. *Mol Genet Metab.* United States;  
684 2018;123: 449–462. doi:10.1016/j.ymgme.2018.02.013
- 685 79. Ma AC, McNulty MS, Poshusta TL, Campbell JM, Martinez-Galvez G, Argue DP, et al.  
686 FusX: A Rapid One-Step Transcription Activator-Like Effector Assembly System for  
687 Genome Science. *Hum Gene Ther.* United States; 2016;27: 451–463.  
688 doi:10.1089/hum.2015.172
- 689 80. Clark KJ, Balciunas D, Pogoda H-M, Ding Y, Westcot SE, Bedell VM, et al. In vivo  
690 protein trapping produces a functional expression codex of the vertebrate proteome. *Nat*  
691 *Methods.* United States; 2011;8: 506–515. doi:10.1038/nmeth.1606
- 692 81. Neff KL, Argue DP, Ma AC, Lee HB, Clark KJ, Ekker SC. Mojo Hand, a TALEN design  
693 tool for genome editing applications. *BMC Bioinformatics.* England; 2013;14: 1.  
694 doi:10.1186/1471-2105-14-1
- 695 82. Clark KJ, Geurts AM, Bell JB, Hackett PB. Transposon vectors for gene-trap insertional  
696 mutagenesis in vertebrates. *Genesis.* United States; 2004;39: 225–233.  
697 doi:10.1002/gene.20049
- 698 83. Clark KJ, Argue DP, Petzold AM, Ekker SC. zfishbook: connecting you to a world of  
699 zebrafish revertible mutants. *Nucleic Acids Res.* England; 2012;40: D907-11.  
700 doi:10.1093/nar/gkr957
- 701 84. Sharma LK, Lu J, Bai Y. Mitochondrial respiratory complex I: structure, function and  
702 implication in human diseases. *Curr Med Chem.* United Arab Emirates; 2009;16: 1266–

- 703 1277.
- 704 85. Liu Y, Fiskum G, Schubert D. Generation of reactive oxygen species by the mitochondrial  
705 electron transport chain. *J Neurochem.* England; 2002;80: 780–787.
- 706 86. King MP, Attardi G. Human cells lacking mtDNA: repopulation with exogenous  
707 mitochondria by complementation. *Science.* United States; 1989;246: 500–503.
- 708 87. Koga Y, Davidson M, Schon EA, King MP. Analysis of cybrids harboring MELAS  
709 mutations in the mitochondrial tRNA(Leu(UUR)) gene. *Muscle Nerve Suppl.* United  
710 States; 1995;3: S119-23.
- 711 88. Vithayathil SA, Ma Y, Kaiparettu BA. Transmitochondrial cybrids: tools for functional  
712 studies of mutant mitochondria. *Methods Mol Biol.* United States; 2012;837: 219–230.  
713 doi:10.1007/978-1-61779-504-6\_15
- 714 89. Wilkins HM, Carl SM, Swerdlow RH. Cytoplasmic hybrid (cybrid) cell lines as a practical  
715 model for mitochondriopathies. *Redox Biol.* Netherlands; 2014;2: 619–631.  
716 doi:10.1016/j.redox.2014.03.006
- 717 90. Bedell VM, Wang Y, Campbell JM, Poshusta TL, Starker CG, Krug RG 2nd, et al. In vivo  
718 genome editing using a high-efficiency TALEN system. *Nature.* England; 2012;491: 114–  
719 118. doi:10.1038/nature11537
- 720 91. Hwang WY, Fu Y, Reyon D, Maeder ML, Tsai SQ, Sander JD, et al. Efficient genome  
721 editing in zebrafish using a CRISPR-Cas system. *Nat Biotechnol.* United States; 2013;31:  
722 227–229. doi:10.1038/nbt.2501
- 723 92. Jiang W, Zhou H, Bi H, Fromm M, Yang B, Weeks DP. Demonstration of

- 724 CRISPR/Cas9/sgRNA-mediated targeted gene modification in Arabidopsis, tobacco,  
725 sorghum and rice. *Nucleic Acids Res. England*; 2013;41: e188. doi:10.1093/nar/gkt780
- 726 93. Fujihara Y, Ikawa M. CRISPR/Cas9-based genome editing in mice by single plasmid  
727 injection. *Methods Enzymol. United States*; 2014;546: 319–336. doi:10.1016/B978-0-12-  
728 801185-0.00015-5
- 729 94. Hsu PD, Lander ES, Zhang F. Development and applications of CRISPR-Cas9 for  
730 genome engineering. *Cell. United States*; 2014;157: 1262–1278.  
731 doi:10.1016/j.cell.2014.05.010
- 732 95. Zhang F, Wen Y, Guo X. CRISPR/Cas9 for genome editing: progress, implications and  
733 challenges. *Hum Mol Genet. England*; 2014;23: R40-6. doi:10.1093/hmg/ddu125
- 734 96. Hashimoto M, Bacman SR, Peralta S, Falk MJ, Chomyn A, Chan DC, et al. MitoTALEN:  
735 A General Approach to Reduce Mutant mtDNA Loads and Restore Oxidative  
736 Phosphorylation Function in Mitochondrial Diseases. *Mol Ther. United States*; 2015;23:  
737 1592–1599. doi:10.1038/mt.2015.126
- 738 97. Niu D, Wei H-J, Lin L, George H, Wang T, Lee I-H, et al. Inactivation of porcine  
739 endogenous retrovirus in pigs using CRISPR-Cas9. *Science. United States*; 2017;357:  
740 1303–1307. doi:10.1126/science.aan4187
- 741 98. Meimaridou E, Kowalczyk J, Guasti L, Hughes CR, Wagner F, Frommolt P, et al.  
742 Mutations in NNT encoding nicotinamide nucleotide transhydrogenase cause familial  
743 glucocorticoid deficiency. *Nat Genet. United States*; 2012;44: 740–742.  
744 doi:10.1038/ng.2299

- 745 99. Bainbridge MN, Davis EE, Choi W-Y, Dickson A, Martinez HR, Wang M, et al. Loss of  
746 Function Mutations in NNT Are Associated With Left Ventricular Noncompaction. *Circ*  
747 *Cardiovasc Genet. United States*; 2015;8: 544–552.  
748 doi:10.1161/CIRCGENETICS.115.001026
- 749 100. Anichtchik O, Diekmann H, Fleming A, Roach A, Goldsmith P, Rubinsztein DC. Loss of  
750 PINK1 function affects development and results in neurodegeneration in zebrafish. *J*  
751 *Neurosci. United States*; 2008;28: 8199–8207. doi:10.1523/JNEUROSCI.0979-08.2008
- 752 101. Fett ME, Pilsl A, Paquet D, van Bebber F, Haass C, Tatzelt J, et al. Parkin is protective  
753 against proteotoxic stress in a transgenic zebrafish model. *PLoS One. United States*;  
754 2010;5: e11783. doi:10.1371/journal.pone.0011783
- 755 102. Sallinen V, Kolehmainen J, Priyadarshini M, Toleikyte G, Chen Y-C, Panula P.  
756 Dopaminergic cell damage and vulnerability to MPTP in Pink1 knockdown zebrafish.  
757 *Neurobiol Dis. United States*; 2010;40: 93–101. doi:10.1016/j.nbd.2010.06.001
- 758 103. Xi Y, Ryan J, Noble S, Yu M, Yilbas AE, Ekker M. Impaired dopaminergic neuron  
759 development and locomotor function in zebrafish with loss of pink1 function. *Eur J*  
760 *Neurosci. France*; 2010;31: 623–633. doi:10.1111/j.1460-9568.2010.07091.x
- 761 104. Kumar MG, Rowley S, Fulton R, Dinday MT, Baraban SC, Patel M. Altered Glycolysis  
762 and Mitochondrial Respiration in a Zebrafish Model of Dravet Syndrome. *eNeuro. United*  
763 *States*; 2016;3. doi:10.1523/ENEURO.0008-16.2016
- 764 105. Baraban SC, Dinday MT, Hortopan GA. Drug screening in *Scn1a* zebrafish mutant  
765 identifies clemizole as a potential Dravet syndrome treatment. *Nat Commun. England*;  
766 2013;4: 2410. doi:10.1038/ncomms3410

- 767 106. Grone BP, Qu T, Baraban SC. Behavioral Comorbidities and Drug Treatments in a  
768 Zebrafish scn1lab Model of Dravet Syndrome. *eNeuro*. United States; 2017;4.  
769 doi:10.1523/ENEURO.0066-17.2017
- 770 107. Guernsey DL, Jiang H, Campagna DR, Evans SC, Ferguson M, Kellogg MD, et al.  
771 Mutations in mitochondrial carrier family gene SLC25A38 cause nonsyndromic  
772 autosomal recessive congenital sideroblastic anemia. *Nat Genet*. United States; 2009;41:  
773 651–653. doi:10.1038/ng.359
- 774 108. Bronnimann D, Annese T, Gorr TA, Djonov V. Splitting of circulating red blood cells as  
775 an in vivo mechanism of erythrocyte maturation in developing zebrafish, chick and mouse  
776 embryos. *J Exp Biol*. England; 2018;221. doi:10.1242/jeb.184564
- 777 109. Berman J, Hsu K, Look AT. Zebrafish as a model organism for blood diseases. *Br J*  
778 *Haematol*. England; 2003;123: 568–576.
- 779 110. Danilova N, Sakamoto KM, Lin S. Ribosomal protein S19 deficiency in zebrafish leads to  
780 developmental abnormalities and defective erythropoiesis through activation of p53  
781 protein family. *Blood*. United States; 2008;112: 5228–5237. doi:10.1182/blood-2008-01-  
782 132290
- 783 111. Butler MG, Gore A V, Weinstein BM. Zebrafish as a model for hemorrhagic stroke.  
784 *Methods Cell Biol*. United States; 2011;105: 137–161. doi:10.1016/B978-0-12-381320-  
785 6.00006-0
- 786 112. Kulkeaw K, Sugiyama D. Zebrafish erythropoiesis and the utility of fish as models of  
787 anemia. *Stem Cell Res Ther*. England; 2012;3: 55. doi:10.1186/scrt146



- 788 113. Kretz CA, Weyand AC, Shavit JA. Modeling Disorders of Blood Coagulation in the  
789 Zebrafish. *Curr Pathobiol Rep.* United States; 2015;3: 155–161. doi:10.1007/s40139-015-  
790 0081-3
- 791 114. Avagyan S, Zon LI. Fish to Learn: Insights into Blood Development and Blood Disorders  
792 from Zebrafish Hematopoiesis. *Hum Gene Ther.* United States; 2016;27: 287–294.  
793 doi:10.1089/hum.2016.024
- 794 115. Prezant TR, Agapian J V, Bohlman MC, Bu X, Oztas S, Qiu WQ, et al. Mitochondrial  
795 ribosomal RNA mutation associated with both antibiotic-induced and non-syndromic  
796 deafness. *Nat Genet.* United States; 1993;4: 289–294. doi:10.1038/ng0793-289
- 797 116. Zhang Q, Zhang L, Chen D, He X, Yao S, Zhang Z, et al. Deletion of Mtu1 (Trmu) in  
798 zebrafish revealed the essential role of tRNA modification in mitochondrial biogenesis  
799 and hearing function. *Nucleic Acids Res.* England; 2018;46: 10930–10945.  
800 doi:10.1093/nar/gky758
- 801 117. DiMauro S, Schon EA. Mitochondrial respiratory-chain diseases. *N Engl J Med.* United  
802 States; 2003;348: 2656–2668. doi:10.1056/NEJMra022567
- 803 118. Jain IH, Zazzeron L, Goli R, Alexa K, Schatzman-Bone S, Dhillon H, et al. Hypoxia as a  
804 therapy for mitochondrial disease. *Science.* United States; 2016;352: 54–61.  
805 doi:10.1126/science.aad9642
- 806 119. Bretau S, Lee S, Guo S. Sensitivity of zebrafish to environmental toxins implicated in  
807 Parkinson's disease. *Neurotoxicol Teratol.* United States; 2004;26: 857–864.  
808 doi:10.1016/j.ntt.2004.06.014

- 809 120. Byrnes J, Ganetzky R, Lightfoot R, Tzeng M, Nakamaru-Ogiso E, Seiler C, et al.  
810 Pharmacologic modeling of primary mitochondrial respiratory chain dysfunction in  
811 zebrafish. *Neurochem Int.* England; 2018;117: 23–34. doi:10.1016/j.neuint.2017.07.008
- 812 121. Xu Y, Chen M, Hu B, Huang R, Hu B. In vivo Imaging of Mitochondrial Transport in  
813 Single-Axon Regeneration of Zebrafish Mauthner Cells. *Front Cell Neurosci.* Switzerland;  
814 2017;11: 4. doi:10.3389/fncel.2017.00004
- 815 122. Dowling JJ, Arbogast S, Hur J, Nelson DD, McEvoy A, Waugh T, et al. Oxidative stress  
816 and successful antioxidant treatment in models of RYR1-related myopathy. *Brain.*  
817 England; 2012;135: 1115–1127. doi:10.1093/brain/aws036
- 818 123. Pickett SB, Thomas ED, Sebe JY, Linbo T, Esterberg R, Hailey DW, et al. Cumulative  
819 mitochondrial activity correlates with ototoxin susceptibility in zebrafish mechanosensory  
820 hair cells. *Elife.* England; 2018;7. doi:10.7554/eLife.38062
- 821 124. Mandal A, Pinter K, Drerup CM. Analyzing Neuronal Mitochondria in vivo Using  
822 Fluorescent Reporters in Zebrafish. *Front cell Dev Biol.* Switzerland; 2018;6: 144.  
823 doi:10.3389/fcell.2018.00144
- 824 125. Liu T-L, Upadhyayula S, Milkie DE, Singh V, Wang K, Swinburne IA, et al. Observing  
825 the cell in its native state: Imaging subcellular dynamics in multicellular organisms.  
826 *Science.* United States; 2018;360. doi:10.1126/science.aaq1392
- 827

## 828 **Figures Legends:**

829 **Figure 1: Circular representation of the zebrafish (NC\_002333.2) and human**  
830 **mitochondrial genomes (NC\_012920.1):** Both genomes share the same synteny, number of  
831 genes and are nearly identical in size.

832 **Figure 2: Zebrafish Marriot mitochondrial mutant collection:** Schematic representation of  
833 various mitochondrial resident pathways for which zebrafish mutants were generated. The  
834 nuclear-encoded mitochondrial proteins have been illustrated according to the function they are  
835 involved in mitochondrial maintenance and homeostasis. Mutants generated by gene editing are  
836 depicted as grey, whereas those generated by the GBT system are depicted in pink.

837 **Figure 3: A depiction of homology of the mutants created for proteins involved in different**  
838 **mitochondrial resident pathways: A-C: Complex 1 of mitochondrial respiratory chain; A:**  
839 **NADH: ubiquinone oxidoreductase subunit AB1 (Ndufab1b); B: NADH dehydrogenase**  
840 **association factor 6 (Ndufaf6); C: NADH dehydrogenase iron sulfur protein 4 (Ndufs4); D:**  
841 **Complex 2 of mitochondrial respiratory chain, Succinate dehydrogenase subunit A (Sdha),**  
842 **subunit; E-F: Complex 3 of mitochondrial respiratory chain; E: Mitochondrial chaperone**  
843 **protein BCS1 (Bcs1l); F: Ubiquinol-cytochrome c reductase subunit VIII (Uqcrcq); G-I:**  
844 **Complex 4 of mitochondrial respiratory chain; G: Protoheme IX farnesyltransferase (Cox10);**  
845 **H: Cytochrome c oxidase IV subunit 1 (Cox4i2b); I: Surfeit locus protein 1 (Surf1); J-K:**  
846 **Complex 5 of mitochondrial respiratory chain; J: ATP synthase subunit epsilon (Atp5e); K:**  
847 **Transmembrane protein 70 (Tmem70); L-M: Biosynthesis of coenzyme Q; L: 4-**  
848 **hydroxybenzoate polyprenyltransferase (Coq2) M: Decaprenyl-disphosphate synthase subunit 2**  
849 **(Pdss2); N-Q: Mitochondrial calcium homeostasis; N: Mitochondrial calcium uptake protein 1**

850 (Mcu1); O: Calcium uniporter protein (Mcu) generated by TALEN and P; GBT; Q: Essential  
851 MCU regulator (Smdt1); **R-U: Mitochondrial genome maintenance**; R: Thymidine kinase 2  
852 (Tk2); S: Leucine-rich pentatricopeptide repeat-containing (Lrprrc); T: Mitochondrial  
853 methionyl-tRNA formyltransferase (Mtfmt); U: 28s Ribosomal protein s18b, mitochondrial  
854 (Mrps18b); **V: Mitochondrial protein import**; Mitochondrial import inner membrane  
855 translocase subunit TIM50 (Timm50); **W-X: Mitochondrial metabolite synthesis**; W: 2-  
856 Oxoglutarate dehydrogenase (Ogdh); X: Isocitrate dehydrogenase (Idh2).

857 **Figures:**

858 **Figure 1:**

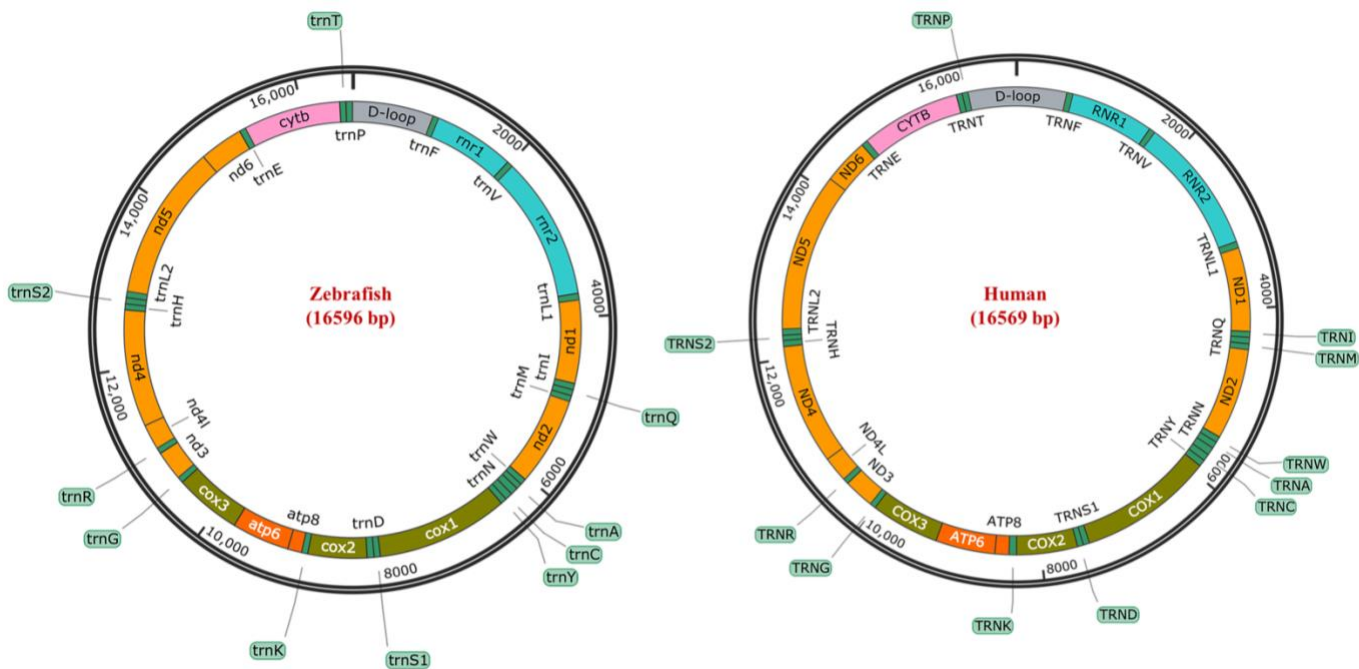

859

860

861 **Figure 2:**

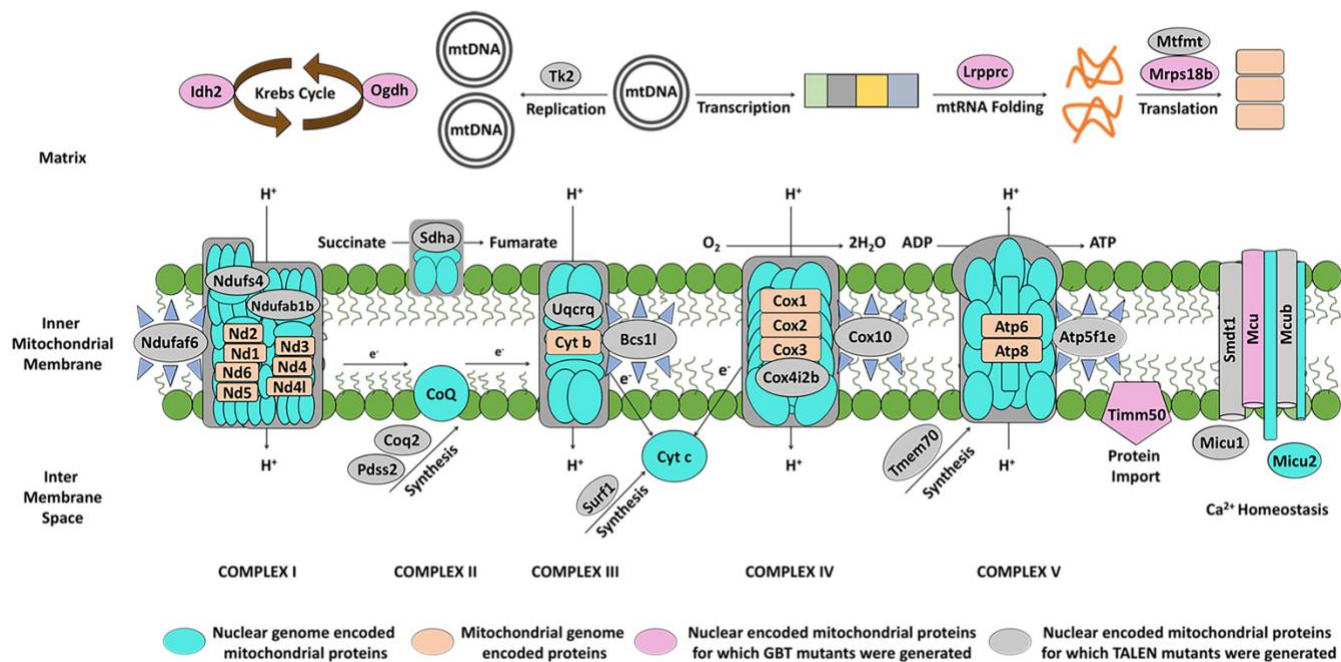

862

863

864 **Figure 3:**

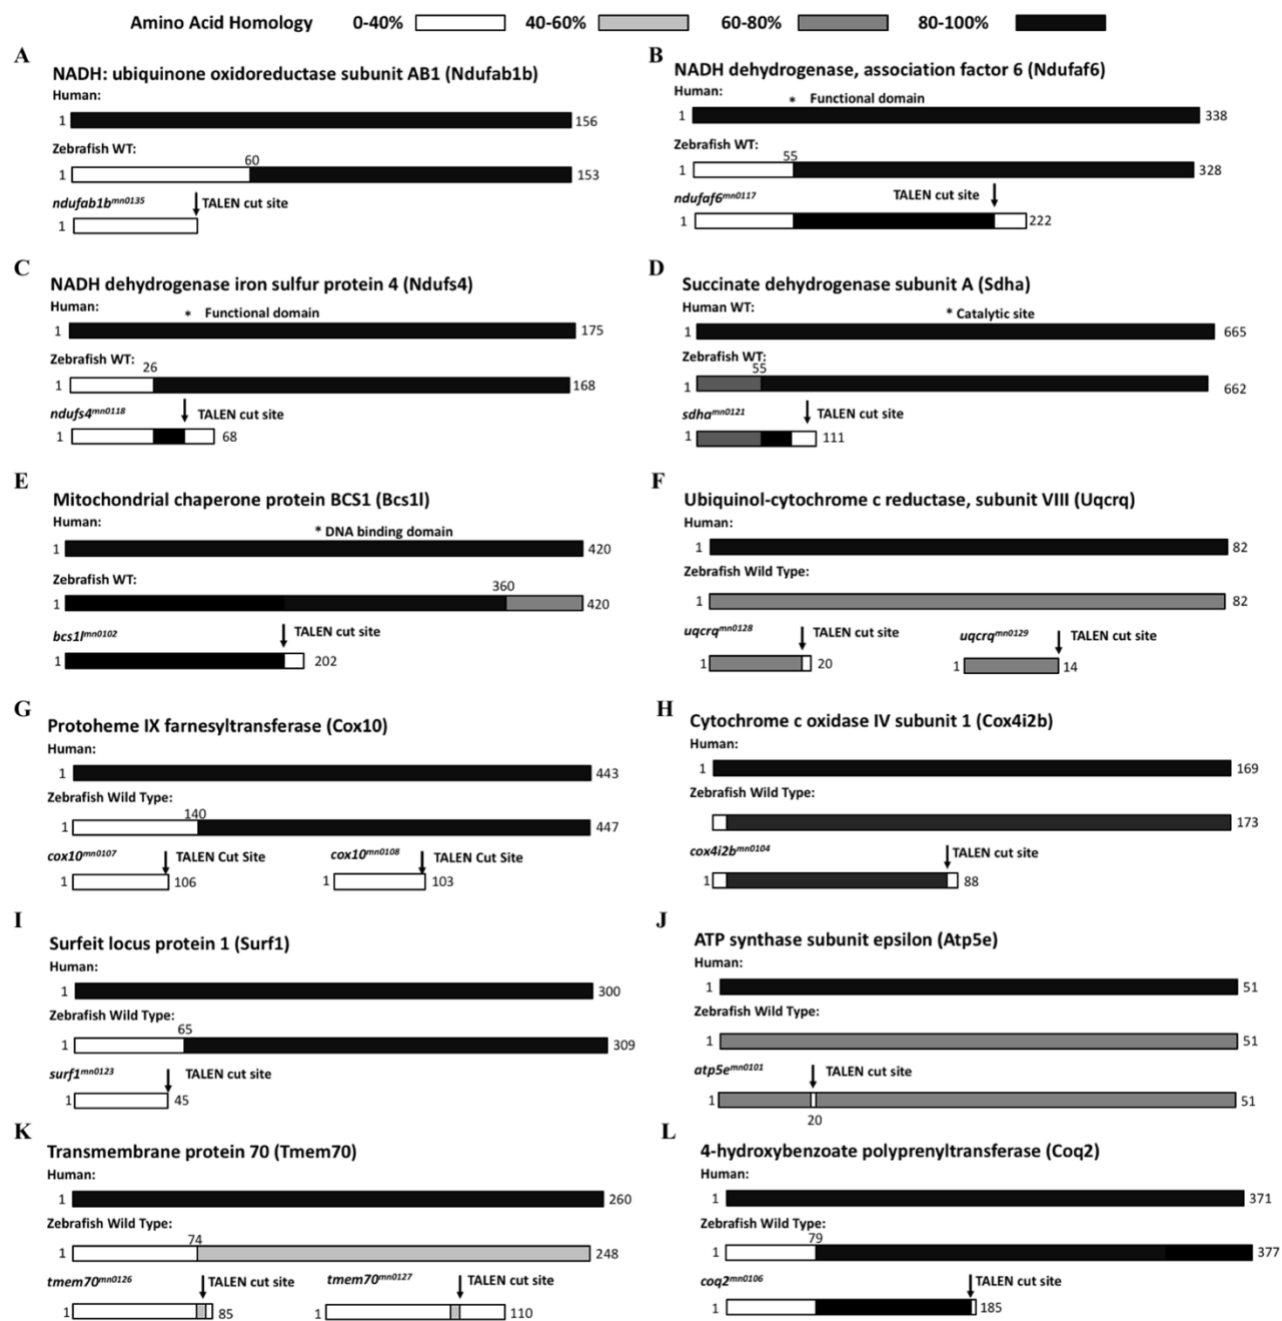

865

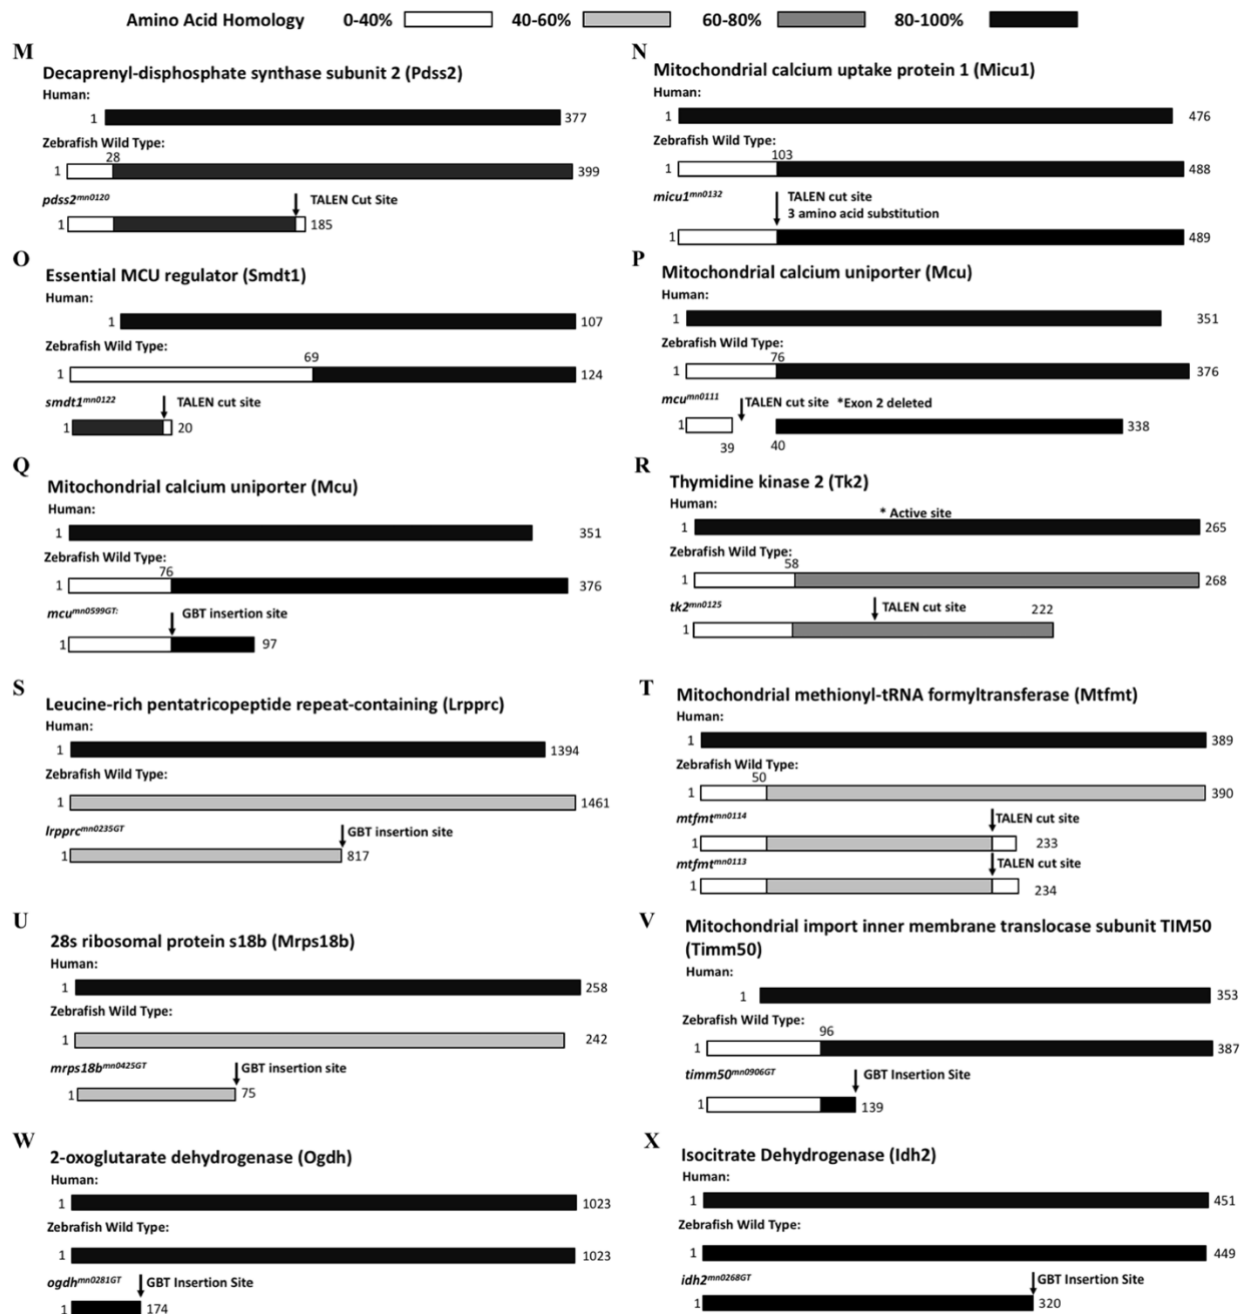

866
